# Supplementary material for: Theoretical Study of Actinide(III)-DOTA Complexes
Source: PubMed Central journal article supplement — ACS Omega. 2021 May 11;6(20):13321–30. doi: 10.1021/acsomega.1c01292 (PMC8158830; doi:10.1021/acsomega.1c01292), 2021-05-11
Supplement: ao1c01292_si_001.pdf [file ao1c01292_si_001.pdf]

## Supporting Information

### Theoretical study of actinide(III)-DOTA complexes

**Attila Kovács**

European Commission, Joint Research Centre, P.O. Box 2340, D-76125 Karlsruhe, Germany  
[attila.kovacs@ec.europa.eu](mailto:attila.kovacs@ec.europa.eu), Phone: +49-7247-951842

#### **Content:**

Table S1. Benchmark results on the Lu(DOTA)H<sub>2</sub>O<sup>-</sup> (SAP) and La(DOTA)H<sub>2</sub>O<sup>-</sup> (TSAP) models as compared to the X-ray diffraction data.

Table S2. SO-CASPT2 energy levels (cm<sup>-1</sup>) of the ground-state multiplets in An(DOTA)(H<sub>2</sub>O)<sup>-</sup> molecules (An = U, Np, Pu).

Table S3. Selected data from analysis of the CASSCF wavefunctions of M(DOTA)(H<sub>2</sub>O)<sup>-</sup> complexes.

Input Gaussian09 file of the SMD solvation calculation on Pu(DOTA)<sup>-</sup> using the PCM radii of Pu.

Cartesian coordinates of the M(DOTA)<sup>-</sup> and M(DOTA)(H<sub>2</sub>O)<sup>-</sup> complexes optimized at the TPSSh/TZ level.

Table S1. Benchmark results<sup>a</sup> on the Lu(DOTA)H<sub>2</sub>O<sup>-</sup> (SAP) and La(DOTA)H<sub>2</sub>O<sup>-</sup> (TSAP) models as compared to the X-ray diffraction data.

| Bond                     |               | X-ray | B3PW91<br>6-311+G** | BH&HLYP | B3LYP | BP86  | PBE   | wB97XD | M062X | TPSSh   |         |          |         |       |
|--------------------------|---------------|-------|---------------------|---------|-------|-------|-------|--------|-------|---------|---------|----------|---------|-------|
|                          |               |       |                     |         |       |       |       |        |       | 6-31G** | cc-pVTZ | 6-31+G** | cc-pVDZ |       |
| <b>Lu</b><br><b>SAP</b>  | <b>Lu-O1</b>  | 2.274 | 2.258               | 2.248   | 2.263 | 2.272 | 2.272 | 2.258  | 2.257 | 2.265   | 2.268   | 2.258    | 2.264   | 2.253 |
|                          | <b>Lu-O2</b>  | 2.283 | 2.275               | 2.264   | 2.280 | 2.291 | 2.291 | 2.276  | 2.276 | 2.283   | 2.288   | 2.274    | 2.282   | 2.271 |
|                          | <b>Lu-Ow</b>  | 2.416 | 2.382               | 2.366   | 2.389 | 2.387 | 2.391 | 2.375  | 2.352 | 2.377   | 2.356   | 2.380    | 2.376   | 2.356 |
|                          | <b>Lu-N1</b>  | 2.597 | 2.723               | 2.739   | 2.762 | 2.729 | 2.727 | 2.728  | 2.688 | 2.690   | 2.693   | 2.708    | 2.689   | 2.703 |
|                          | <b>Lu-N2</b>  | 2.630 | 2.729               | 2.745   | 2.770 | 2.735 | 2.733 | 2.730  | 2.689 | 2.693   | 2.695   | 2.712    | 2.691   | 2.706 |
| <b>La</b><br><b>TSAP</b> | <b>La-O1</b>  | 2.484 | 2.447               | 2.440   | 2.454 | 2.461 | 2.459 | 2.453  | 2.441 | 2.456   | 2.474   | 2.451    | 2.455   | 2.441 |
|                          | <b>La-O2</b>  | 2.500 | 2.464               | 2.456   | 2.471 | 2.480 | 2.478 | 2.470  | 2.460 | 2.474   | 2.495   | 2.465    | 2.473   | 2.459 |
|                          | <b>La-Ow*</b> | 2.537 | 2.605               | 2.591   | 2.613 | 2.608 | 2.608 | 2.586  | 2.564 | 2.604   | 2.583   | 2.597    | 2.601   | 2.582 |
|                          | <b>La-N1</b>  | 2.784 | 2.887               | 2.910   | 2.935 | 2.894 | 2.889 | 2.877  | 2.845 | 2.857   | 2.841   | 2.869    | 2.855   | 2.866 |
|                          | <b>La-N2</b>  | 2.754 | 2.866               | 2.886   | 2.908 | 2.871 | 2.867 | 2.857  | 2.829 | 2.839   | 2.827   | 2.848    | 2.837   | 2.851 |
| <b>Av<sup>b</sup></b>    | <b>Lu</b>     |       | 0.057               | 0.070   | 0.069 | 0.055 | 0.054 | 0.059  | 0.048 | 0.041   | 0.046   | 0.051    | 0.041   | 0.055 |
|                          | <b>La</b>     |       | 0.071               | 0.080   | 0.088 | 0.068 | 0.067 | 0.061  | 0.049 | 0.056   | 0.038   | 0.061    | 0.055   | 0.062 |

<sup>a</sup>Using the 4f-in-core pseudopotentials of the Stuttgart-Cologne group for La and Lu. The basis set of the light atoms was in most cases 6-311+G\*\*, exceptions given in the heading.

<sup>b</sup>Average of mean absolute deviations from the experimental bond distances.

Table S2. SO-CASPT2 energy levels (cm<sup>-1</sup>) of the ground-state multiplets in An(DOTA)(H<sub>2</sub>O)<sup>-</sup> molecules (An = U, Np, Pu).

| U ( <sup>4</sup> I <sub>9/2</sub> ) <sup>a</sup> | Np ( <sup>5</sup> I <sub>4</sub> ) | Pu ( <sup>6</sup> H <sub>5/2</sub> ) <sup>a</sup> |
|--------------------------------------------------|------------------------------------|---------------------------------------------------|
| 0                                                | 0                                  | 0                                                 |
| 116                                              | 172                                | 621                                               |
| 887                                              | 381                                | 1052                                              |
| 1531                                             | 383                                |                                                   |
| 1658                                             | 590                                |                                                   |
|                                                  | 1175                               |                                                   |
|                                                  | 1344                               |                                                   |
|                                                  | 1489                               |                                                   |
|                                                  | 1658                               |                                                   |

<sup>a</sup>Doublet.

Table S3. Selected data<sup>a</sup> from analysis of the CASSCF wavefunctions of M(DOTA)(H<sub>2</sub>O)<sup>-</sup> complexes.

| M  | Wiberg bond indices |      |                   | Topological data |                   |       |                  |                   |      |
|----|---------------------|------|-------------------|------------------|-------------------|-------|------------------|-------------------|------|
|    | M-N                 | M-O  | M-OH <sub>2</sub> | ρ                |                   |       | ∇ <sup>2</sup> ρ |                   |      |
|    |                     |      |                   | M-O              | M-OH <sub>2</sub> | M-N   | M-O              | M-OH <sub>2</sub> | M-N  |
| Ac | 0.10                | 0.25 | 0.15              | 0.048            | 0.030             | 0.025 | 0.19             | 0.13              | 0.09 |
| U  | 0.09                | 0.21 | 0.13              | 0.051            | 0.034             | 0.027 | 0.21             | 0.17              | 0.10 |
| Np | 0.09                | 0.20 | 0.13              | 0.051            | 0.037             | 0.027 | 0.22             | 0.18              | 0.11 |
| Pu | 0.09                | 0.21 | 0.14              | 0.052            | 0.037             | 0.027 | 0.23             | 0.19              | 0.11 |
| Am | 0.09                | 0.21 | 0.14              | 0.052            | 0.038             | 0.028 | 0.24             | 0.20              | 0.11 |
| Cm | 0.09                | 0.20 | 0.14              | 0.053            | 0.038             | 0.028 | 0.25             | 0.20              | 0.11 |
| Cf | 0.07                | 0.18 | 0.14              | 0.053            | 0.040             | 0.028 | 0.24             | 0.20              | 0.10 |
| La | 0.09                | 0.25 | 0.15              | 0.050            | 0.034             | 0.027 | 0.19             | 0.15              | 0.09 |
| Lu | 0.09                | 0.22 | 0.15              | 0.055            | 0.039             | 0.023 | 0.29             | 0.22              | 0.10 |

<sup>a</sup>Wiberg bond indices of the M-ligand bonds; electron densities (ρ, au) and Laplacians of electron density (∇<sup>2</sup>ρ, au) at selected bond critical points (BCP). The different values of the M-O and M-N BCPs (because of the C<sub>2</sub> symmetry of DOTA) are averaged.

**Input Gaussian09 file of the SMD solvation calculation on Pu(DOTA)-  
using the PCM radii of Pu.**

```
%chk=Pu_DOTATSAP_SMD.chk  
%nproc=24  
%mem=28000MB  
# TPSSH/gen Int(Grid=Superfine) pseudo=read SCRF(SMD,Read) Pop=None
```

Pu-DOTA without H<sub>2</sub>O ligand, TSAP isomer

```
-1 1  
94 0.000000 0.000000 0.638334  
7 0.957849 1.882107 -1.166835  
7 -1.882107 0.957849 -1.166835  
7 -0.957849 -1.882107 -1.166835  
7 1.882107 -0.957849 -1.166835  
8 1.854081 1.389103 1.363695  
8 -1.389103 1.854081 1.363695  
8 -1.854081 -1.389103 1.363695  
8 1.389103 -1.854081 1.363695  
8 2.811986 3.447514 1.459351  
8 -3.447514 2.811986 1.459351  
8 -2.811986 -3.447514 1.459351  
8 3.447514 -2.811986 1.459351  
6 2.052228 2.611969 0.972434  
6 -2.611969 2.052228 0.972434  
6 -2.052228 -2.611969 0.972434  
6 2.611969 -2.052228 0.972434  
6 0.000000 2.221588 -2.236047  
6 -1.444548 2.251356 -1.739518  
6 -2.221588 0.000000 -2.236047  
6 -2.251356 -1.444548 -1.739518  
6 0.000000 -2.221588 -2.236047  
6 1.444548 -2.251356 -1.739518  
6 2.221588 0.000000 -2.236047  
6 2.251356 1.444548 -1.739518  
6 1.195058 3.031165 -0.251991  
6 -3.031165 1.195058 -0.251991  
6 -1.195058 -3.031165 -0.251991  
6 3.031165 -1.195058 -0.251991  
1 0.102779 1.475563 -3.032885  
1 0.243582 3.199346 -2.687895  
1 -1.544878 3.004705 -0.955420  
1 -2.106016 2.557889 -2.568382  
1 -1.475563 0.102779 -3.032885  
1 -3.199346 0.243582 -2.687895  
1 -3.004705 -1.544878 -0.955420  
1 -2.557889 -2.106016 -2.568382  
1 -0.102779 -1.475563 -3.032885  
1 -0.243582 -3.199346 -2.687895
```

1 1.544878 -3.004705 -0.955420  
1 2.106016 -2.557889 -2.568382  
1 1.475563 -0.102779 -3.032885  
1 3.199346 -0.243582 -2.687895  
1 3.004705 1.544878 -0.955420  
1 2.557889 2.106016 -2.568382  
1 1.682909 3.864851 -0.779104  
1 0.228725 3.367604 0.137046  
1 -3.864851 1.682909 -0.779104  
1 -3.367604 0.228725 0.137046  
1 -1.682909 -3.864851 -0.779104  
1 -0.228725 -3.367604 0.137046  
1 3.864851 -1.682909 -0.779104  
1 3.367604 -0.228725 0.137046

N C O H 0

6-31G(d,p)

\*\*\*\*

Pu 0

S 3 1.00

0.65609769D+01 -0.11962136

0.43739846D+01 0.78777152

0.29101337D+01 -1.17929153

S 2 1.00

0.56932013D+00 0.94235277

0.25405464D+00 0.36852651

S 1 1.00

0.73988463D-01 1.0

S 1 1.00

0.28837732D-01 1.0

P 3 1.00

0.37202910D+01 0.12119815

0.24801937D+01 -0.32571291

0.69446253D+00 0.45088197

P 2 1.00

0.34470180D+00 0.52984913

0.16360360D+00 0.17862426

P 1 1.00

0.67592645D-01 1.0

D 3 1.00

0.14436787D+01 -0.07919020

0.96245248D+00 0.10455122

0.40935068D+00 0.36548009

D 1 1.00

0.15000000D+00 1.0

D 1 1.00

0.50289521D-01 1.0

\*\*\*\*

Pu 0

ECP83MWB 4 83

G-Komponente

1

2 1.000000 0.000000

S-G

2

2 3.878850 101.511078

2 2.547456 -12.372693

P-G

2

2 3.029556 61.852609

2 2.026047 -0.872344

D-G

2

2 1.965746 27.691029

2 1.596316 1.101169

F-G

2

2 1.689032 -6.953746

2 0.892098 4.615700

ModifySph

Pu 1.807 1.0

## Cartesian coordinates

### Ac(DOTA)<sup>-</sup> SAP

|    |             |             |             |
|----|-------------|-------------|-------------|
| Ac | 0.00000000  | 0.00000000  | 0.83903000  |
| N  | 0.21119100  | 2.14600200  | -1.06815400 |
| N  | 2.14600200  | -0.21119100 | -1.06815400 |
| N  | -0.21119100 | -2.14600200 | -1.06815400 |
| N  | -2.14600200 | 0.21119100  | -1.06815400 |
| O  | -1.29932600 | 2.09398200  | 1.29999200  |
| O  | 2.09398200  | 1.29932600  | 1.29999200  |
| O  | 1.29932600  | -2.09398200 | 1.29999200  |
| O  | -2.09398200 | -1.29932600 | 1.29999200  |
| O  | 4.25431300  | 1.87052400  | 0.95602700  |
| O  | 1.87052400  | -4.25431300 | 0.95602700  |
| O  | -4.25431300 | -1.87052400 | 0.95602700  |
| O  | -1.87052400 | 4.25431300  | 0.95602700  |
| C  | -1.18045300 | 3.25569300  | 0.75159000  |
| C  | 3.25569300  | 1.18045300  | 0.75159000  |
| C  | 1.18045300  | -3.25569300 | 0.75159000  |
| C  | -3.25569300 | -1.18045300 | 0.75159000  |
| C  | 1.56850000  | 2.17828500  | -1.66473600 |
| C  | 2.05308700  | 0.80739100  | -2.13757300 |
| C  | 2.17828500  | -1.56850000 | -1.66473600 |
| C  | 0.80739100  | -2.05308700 | -2.13757300 |
| C  | -1.56850000 | -2.17828500 | -1.66473600 |
| C  | -2.05308700 | -0.80739100 | -2.13757300 |
| C  | -2.17828500 | 1.56850000  | -1.66473600 |
| C  | -0.80739100 | 2.05308700  | -2.13757300 |
| C  | 0.00000000  | 3.36689200  | -0.24268100 |
| C  | 3.36689200  | 0.00000000  | -0.24268100 |
| C  | 0.00000000  | -3.36689200 | -0.24268100 |
| C  | -3.36689200 | 0.00000000  | -0.24268100 |
| H  | 0.89915600  | 3.49884500  | 0.36675600  |
| H  | -0.13403000 | 4.25213200  | -0.88036800 |
| H  | 4.25213200  | 0.13403000  | -0.88036800 |
| H  | 3.49884500  | -0.89915600 | 0.36675600  |
| H  | 0.13403000  | -4.25213200 | -0.88036800 |
| H  | -0.89915600 | -3.49884500 | 0.36675600  |
| H  | -3.49884500 | 0.89915600  | 0.36675600  |
| H  | -4.25213200 | -0.13403000 | -0.88036800 |
| H  | 2.25067200  | 2.57417600  | -0.91296300 |
| H  | 1.59891400  | 2.86890400  | -2.52538700 |
| H  | 3.03694400  | 0.93714500  | -2.61991700 |
| H  | 1.37603400  | 0.42480900  | -2.90720500 |
| H  | 2.86890400  | -1.59891400 | -2.52538700 |
| H  | 2.57417600  | -2.25067200 | -0.91296300 |
| H  | 0.93714500  | -3.03694400 | -2.61991700 |
| H  | 0.42480900  | -1.37603400 | -2.90720500 |
| H  | -1.59891400 | -2.86890400 | -2.52538700 |
| H  | -2.25067200 | -2.57417600 | -0.91296300 |
| H  | -1.37603400 | -0.42480900 | -2.90720500 |
| H  | -3.03694400 | -0.93714500 | -2.61991700 |
| H  | -2.57417600 | 2.25067200  | -0.91296300 |
| H  | -2.86890400 | 1.59891400  | -2.52538700 |
| H  | -0.42480900 | 1.37603400  | -2.90720500 |
| H  | -0.93714500 | 3.03694400  | -2.61991700 |

### Ac(DOTA)<sup>-</sup> TSAP

|    |             |             |             |
|----|-------------|-------------|-------------|
| Ac | 0.00000000  | 0.00000000  | 0.77812000  |
| N  | 0.96913500  | 1.90426500  | -1.18396300 |
| N  | -1.90426500 | 0.96913500  | -1.18396300 |
| N  | -0.96913500 | -1.90426500 | -1.18396300 |
| N  | 1.90426500  | -0.96913500 | -1.18396300 |
| O  | 1.87793700  | 1.55394000  | 1.36670400  |
| O  | -1.55394000 | 1.87793700  | 1.36670400  |
| O  | -1.87793700 | -1.55394000 | 1.36670400  |
| O  | 1.55394000  | -1.87793700 | 1.36670400  |
| O  | 2.83641600  | 3.60495200  | 1.35481700  |
| O  | -3.60495200 | 2.83641600  | 1.35481700  |
| O  | -2.83641600 | -3.60495200 | 1.35481700  |
| O  | 3.60495200  | -2.83641600 | 1.35481700  |
| C  | 2.07969000  | 2.74472100  | 0.91199400  |
| C  | -2.74472100 | 2.07969000  | 0.91199400  |
| C  | -2.07969000 | -2.74472100 | 0.91199400  |
| C  | 2.74472100  | -2.07969000 | 0.91199400  |
| C  | 0.00000000  | 2.21111400  | -2.25438900 |
| C  | -1.44264700 | 2.25434700  | -1.75669900 |
| C  | -2.21111400 | 0.00000000  | -2.25438900 |
| C  | -2.25434700 | -1.44264700 | -1.75669900 |
| C  | 0.00000000  | -2.21111400 | -2.25438900 |
| C  | 1.44264700  | -2.25434700 | -1.75669900 |
| C  | 2.21111400  | 0.00000000  | -2.25438900 |
| C  | 2.25434700  | 1.44264700  | -1.75669900 |
| C  | 1.22608000  | 3.09654200  | -0.33419200 |
| C  | -3.09654200 | 1.22608000  | -0.33419200 |
| C  | -1.22608000 | -3.09654200 | -0.33419200 |
| C  | 3.09654200  | -1.22608000 | -0.33419200 |
| H  | 0.10153600  | 1.44935000  | -3.03348400 |
| H  | 0.23921400  | 3.17807900  | -2.72934000 |
| H  | -1.53585200 | 3.00917600  | -0.97388100 |
| H  | -2.09948500 | 2.56744600  | -2.58638500 |
| H  | -1.44935000 | 0.10153600  | -3.03348400 |
| H  | -3.17807900 | 0.23921400  | -2.72934000 |
| H  | -3.00917600 | -1.53585200 | -0.97388100 |
| H  | -2.56744600 | -2.09948500 | -2.58638500 |
| H  | -0.10153600 | -1.44935000 | -3.03348400 |
| H  | -0.23921400 | -3.17807900 | -2.72934000 |
| H  | 1.53585200  | -3.00917600 | -0.97388100 |
| H  | 2.09948500  | -2.56744600 | -2.58638500 |
| H  | 1.44935000  | -0.10153600 | -3.03348400 |
| H  | 3.17807900  | -0.23921400 | -2.72934000 |
| H  | 3.00917600  | 1.53585200  | -0.97388100 |
| H  | 2.56744600  | 2.09948500  | -2.58638500 |
| H  | 1.72119800  | 3.89211700  | -0.90969200 |
| H  | 0.26809400  | 3.47506800  | 0.03488700  |
| H  | -3.89211700 | 1.72119800  | -0.90969200 |
| H  | -3.47506800 | 0.26809400  | 0.03488700  |
| H  | -1.72119800 | -3.89211700 | -0.90969200 |
| H  | -0.26809400 | -3.47506800 | 0.03488700  |
| H  | 3.89211700  | -1.72119800 | -0.90969200 |
| H  | 3.47506800  | -0.26809400 | 0.03488700  |

### Am(DOTA)- SAP

|    |             |             |             |
|----|-------------|-------------|-------------|
| Am | 0.00000000  | 0.00000000  | 0.68176800  |
| N  | 0.21633300  | 2.11939100  | -1.05553400 |
| N  | 2.11939100  | -0.21633300 | -1.05553400 |
| N  | -0.21633300 | -2.11939100 | -1.05553400 |
| N  | -2.11939100 | 0.21633300  | -1.05553400 |
| O  | -1.26978000 | 1.94483100  | 1.31725000  |
| O  | 1.94483100  | 1.26978000  | 1.31725000  |
| O  | 1.26978000  | -1.94483100 | 1.31725000  |
| O  | -1.94483100 | -1.26978000 | 1.31725000  |
| O  | 4.11285100  | 1.85991600  | 1.08624000  |
| O  | 1.85991600  | -4.11285100 | 1.08624000  |
| O  | -4.11285100 | -1.85991600 | 1.08624000  |
| O  | -1.85991600 | 4.11285100  | 1.08624000  |
| C  | -1.16315700 | 3.13189800  | 0.82499600  |
| C  | 3.13189800  | 1.16315700  | 0.82499600  |
| C  | 1.16315700  | -3.13189800 | 0.82499600  |
| C  | -3.13189800 | -1.16315700 | 0.82499600  |
| C  | 1.57372000  | 2.17057100  | -1.64953300 |
| C  | 2.06072400  | 0.80283400  | -2.12638900 |
| C  | 2.17057100  | -1.57372000 | -1.64953300 |
| C  | 0.80283400  | -2.06072400 | -2.12638900 |
| C  | -1.57372000 | -2.17057100 | -1.64953300 |
| C  | -2.06072400 | -0.80283400 | -2.12638900 |
| C  | -2.17057100 | 1.57372000  | -1.64953300 |
| C  | -0.80283400 | 2.06072400  | -2.12638900 |
| C  | 0.00000000  | 3.30499000  | -0.17938600 |
| C  | 3.30499000  | 0.00000000  | -0.17938600 |
| C  | 0.00000000  | -3.30499000 | -0.17938600 |
| C  | -3.30499000 | 0.00000000  | -0.17938600 |
| H  | 0.90394800  | 3.42374900  | 0.42449100  |
| H  | -0.15809100 | 4.21114500  | -0.78033300 |
| H  | 4.21114500  | 0.15809100  | -0.78033300 |
| H  | 3.42374900  | -0.90394800 | 0.42449100  |
| H  | 0.15809100  | -4.21114500 | -0.78033300 |
| H  | -0.90394800 | -3.42374900 | 0.42449100  |
| H  | -3.42374900 | 0.90394800  | 0.42449100  |
| H  | -4.21114500 | -0.15809100 | -0.78033300 |
| H  | 2.25281700  | 2.56310700  | -0.89312600 |
| H  | 1.60071200  | 2.86838400  | -2.50357700 |
| H  | 3.05571200  | 0.92660100  | -2.58610600 |
| H  | 1.39563500  | 0.42779800  | -2.91063400 |
| H  | 2.86838400  | -1.60071200 | -2.50357700 |
| H  | 2.56310700  | -2.25281700 | -0.89312600 |
| H  | 0.92660100  | -3.05571200 | -2.58610600 |
| H  | 0.42779800  | -1.39563500 | -2.91063400 |
| H  | -1.60071200 | -2.86838400 | -2.50357700 |
| H  | -2.25281700 | -2.56310700 | -0.89312600 |
| H  | -1.39563500 | -0.42779800 | -2.91063400 |
| H  | -3.05571200 | -0.92660100 | -2.58610600 |
| H  | -2.56310700 | 2.25281700  | -0.89312600 |
| H  | -2.86838400 | 1.60071200  | -2.50357700 |
| H  | -0.42779800 | 1.39563500  | -2.91063400 |
| H  | -0.92660100 | 3.05571200  | -2.58610600 |

### Am(DOTA)- TSAP

|    |             |             |             |
|----|-------------|-------------|-------------|
| Am | 0.00000000  | 0.00000000  | 0.63119600  |
| N  | 0.95733000  | 1.88093700  | -1.16633000 |
| N  | -1.88093700 | 0.95733000  | -1.16633000 |
| N  | -0.95733000 | -1.88093700 | -1.16633000 |
| N  | 1.88093700  | -0.95733000 | -1.16633000 |
| O  | 1.82005100  | 1.39566900  | 1.36346800  |
| O  | -1.39566900 | 1.82005100  | 1.36346800  |
| O  | -1.82005100 | -1.39566900 | 1.36346800  |
| O  | 1.39566900  | -1.82005100 | 1.36346800  |
| O  | 2.80248100  | 3.43071700  | 1.46782900  |
| O  | -3.43071700 | 2.80248100  | 1.46782900  |
| O  | -2.80248100 | -3.43071700 | 1.46782900  |
| O  | 3.43071700  | -2.80248100 | 1.46782900  |
| C  | 2.03545300  | 2.60777800  | 0.97501400  |
| C  | -2.60777800 | 2.03545300  | 0.97501400  |
| C  | -2.03545300 | -2.60777800 | 0.97501400  |
| C  | 2.60777800  | -2.03545300 | 0.97501400  |
| C  | 0.00000000  | 2.21961600  | -2.23657500 |
| C  | -1.44209400 | 2.25055900  | -1.73947700 |
| C  | -2.21961600 | 0.00000000  | -2.23657500 |
| C  | -2.25055900 | -1.44209400 | -1.73947700 |
| C  | 0.00000000  | -2.21961600 | -2.23657500 |
| C  | 1.44209400  | -2.25055900 | -1.73947700 |
| C  | 2.21961600  | 0.00000000  | -2.23657500 |
| C  | 2.25055900  | 1.44209400  | -1.73947700 |
| C  | 1.20109100  | 3.03448900  | -0.25970800 |
| C  | -3.03448900 | 1.20109100  | -0.25970800 |
| C  | -1.20109100 | -3.03448900 | -0.25970800 |
| C  | 3.03448900  | -1.20109100 | -0.25970800 |
| H  | 0.10417300  | 1.47476100  | -3.03226700 |
| H  | 0.24504900  | 3.19714600  | -2.68540500 |
| H  | -1.54123400 | 3.00407400  | -0.95639200 |
| H  | -2.10567800 | 2.55464100  | -2.56627000 |
| H  | -1.47476100 | 0.10417300  | -3.03226700 |
| H  | -3.19714600 | 0.24504900  | -2.68540500 |
| H  | -3.00407400 | -1.54123400 | -0.95639200 |
| H  | -2.55464100 | -2.10567800 | -2.56627000 |
| H  | -0.10417300 | -1.47476100 | -3.03226700 |
| H  | -0.24504900 | -3.19714600 | -2.68540500 |
| H  | 1.54123400  | -3.00407400 | -0.95639200 |
| H  | 2.10567800  | -2.55464100 | -2.56627000 |
| H  | 1.47476100  | -0.10417300 | -3.03226700 |
| H  | 3.19714600  | -0.24504900 | -2.68540500 |
| H  | 3.00407400  | 1.54123400  | -0.95639200 |
| H  | 2.55464100  | 2.10567800  | -2.56627000 |
| H  | 1.70928800  | 3.85280500  | -0.78921400 |
| H  | 0.23952500  | 3.39385600  | 0.11704000  |
| H  | -3.85280500 | 1.70928800  | -0.78921400 |
| H  | -3.39385600 | 0.23952500  | 0.11704000  |
| H  | -1.70928800 | -3.85280500 | -0.78921400 |
| H  | -0.23952500 | -3.39385600 | 0.11704000  |
| H  | 3.85280500  | -1.70928800 | -0.78921400 |
| H  | 3.39385600  | -0.23952500 | 0.11704000  |



**Cf(DOTA)- SAP**

|    |             |             |             |
|----|-------------|-------------|-------------|
| Cf | 0.00000000  | 0.00000000  | 0.63013800  |
| N  | 0.21907800  | 2.10924900  | -1.05504700 |
| N  | 2.10924900  | -0.21907800 | -1.05504700 |
| N  | -0.21907800 | -2.10924900 | -1.05504700 |
| N  | -2.10924900 | 0.21907800  | -1.05504700 |
| O  | -1.24943100 | 1.88289200  | 1.31483600  |
| O  | 1.88289200  | 1.24943100  | 1.31483600  |
| O  | 1.24943100  | -1.88289200 | 1.31483600  |
| O  | -1.88289200 | -1.24943100 | 1.31483600  |
| O  | 4.05362500  | 1.84716200  | 1.14275900  |
| O  | 1.84716200  | -4.05362500 | 1.14275900  |
| O  | -4.05362500 | -1.84716200 | 1.14275900  |
| O  | -1.84716200 | 4.05362500  | 1.14275900  |
| C  | -1.15016600 | 3.08167700  | 0.85043400  |
| C  | 3.08167700  | 1.15016600  | 0.85043400  |
| C  | 1.15016600  | -3.08167700 | 0.85043400  |
| C  | -3.08167700 | -1.15016600 | 0.85043400  |
| C  | 1.57647200  | 2.16651500  | -1.64759000 |
| C  | 2.06286500  | 0.79969900  | -2.12641300 |
| C  | 2.16651500  | -1.57647200 | -1.64759000 |
| C  | 0.79969900  | -2.06286500 | -2.12641300 |
| C  | -1.57647200 | -2.16651500 | -1.64759000 |
| C  | -2.06286500 | -0.79969900 | -2.12641300 |
| C  | -2.16651500 | 1.57647200  | -1.64759000 |
| C  | -0.79969900 | 2.06286500  | -2.12641300 |
| C  | 0.00000000  | 3.28209000  | -0.16253400 |
| C  | 3.28209000  | 0.00000000  | -0.16253400 |
| C  | 0.00000000  | -3.28209000 | -0.16253400 |
| C  | -3.28209000 | 0.00000000  | -0.16253400 |
| H  | 0.90753500  | 3.40250100  | 0.43506400  |
| H  | -0.17414800 | 4.19386700  | -0.75020000 |
| H  | 4.19386700  | 0.17414800  | -0.75020000 |
| H  | 3.40250100  | -0.90753500 | 0.43506400  |
| H  | 0.17414800  | -4.19386700 | -0.75020000 |
| H  | -0.90753500 | -3.40250100 | 0.43506400  |
| H  | -3.40250100 | 0.90753500  | 0.43506400  |
| H  | -4.19386700 | -0.17414800 | -0.75020000 |
| H  | 2.25472300  | 2.55642900  | -0.88894100 |
| H  | 1.60352600  | 2.86751400  | -2.49880200 |
| H  | 3.06135100  | 0.92039600  | -2.57919300 |
| H  | 1.40101800  | 0.42796700  | -2.91511200 |
| H  | 2.86751400  | -1.60352600 | -2.49880200 |
| H  | 2.55642900  | -2.25472300 | -0.88894100 |
| H  | 0.92039600  | -3.06135100 | -2.57919300 |
| H  | 0.42796700  | -1.40101800 | -2.91511200 |
| H  | -1.60352600 | -2.86751400 | -2.49880200 |
| H  | -2.25472300 | -2.55642900 | -0.88894100 |
| H  | -1.40101800 | -0.42796700 | -2.91511200 |
| H  | -3.06135100 | -0.92039600 | -2.57919300 |
| H  | -2.55642900 | 2.25472300  | -0.88894100 |
| H  | -2.86751400 | 1.60352600  | -2.49880200 |
| H  | -0.42796700 | 1.40101800  | -2.91511200 |
| H  | -0.92039600 | 3.06135100  | -2.57919300 |

**Cf(DOTA)- TSAP**

|    |             |             |             |
|----|-------------|-------------|-------------|
| Cf | 0.00000000  | 0.00000000  | 0.58355300  |
| N  | 0.95272200  | 1.87246500  | -1.16291200 |
| N  | -1.87246500 | 0.95272200  | -1.16291200 |
| N  | -0.95272200 | -1.87246500 | -1.16291200 |
| N  | 1.87246500  | -0.95272200 | -1.16291200 |
| O  | 1.78718700  | 1.33653900  | 1.35500300  |
| O  | -1.33653900 | 1.78718700  | 1.35500300  |
| O  | -1.78718700 | -1.33653900 | 1.35500300  |
| O  | 1.33653900  | -1.78718700 | 1.35500300  |
| O  | 2.77970200  | 3.36265100  | 1.51323500  |
| O  | -3.36265100 | 2.77970200  | 1.51323500  |
| O  | -2.77970200 | -3.36265100 | 1.51323500  |
| O  | 3.36265100  | -2.77970200 | 1.51323500  |
| C  | 2.01168400  | 2.55623600  | 0.99559300  |
| C  | -2.55623600 | 2.01168400  | 0.99559300  |
| C  | -2.01168400 | -2.55623600 | 0.99559300  |
| C  | 2.55623600  | -2.01168400 | 0.99559300  |
| C  | 0.00000000  | 2.22234700  | -2.23299000 |
| C  | -1.44157500 | 2.24879700  | -1.73558700 |
| C  | -2.22234700 | 0.00000000  | -2.23299000 |
| C  | -2.24879700 | -1.44157500 | -1.73558700 |
| C  | 0.00000000  | -2.22234700 | -2.23299000 |
| C  | 1.44157500  | -2.24879700 | -1.73558700 |
| C  | 2.22234700  | 0.00000000  | -2.23299000 |
| C  | 2.24879700  | 1.44157500  | -1.73558700 |
| C  | 1.19326900  | 3.01226800  | -0.23837700 |
| C  | -3.01226800 | 1.19326900  | -0.23837700 |
| C  | -1.19326900 | -3.01226800 | -0.23837700 |
| C  | 3.01226800  | -1.19326900 | -0.23837700 |
| H  | 0.10487900  | 1.48343200  | -3.03434600 |
| H  | 0.24695300  | 3.20332600  | -2.67298400 |
| H  | -1.54230100 | 3.00130900  | -0.95175800 |
| H  | -2.10797500 | 2.55059300  | -2.56071900 |
| H  | -1.48343200 | 0.10487900  | -3.03434600 |
| H  | -3.20332600 | 0.24695300  | -2.67298400 |
| H  | -3.00130900 | -1.54230100 | -0.95175800 |
| H  | -2.55059300 | -2.10797500 | -2.56071900 |
| H  | -0.10487900 | -1.48343200 | -3.03434600 |
| H  | -0.24695300 | -3.20332600 | -2.67298400 |
| H  | 1.54230100  | -3.00130900 | -0.95175800 |
| H  | 2.10797500  | -2.55059300 | -2.56071900 |
| H  | 1.48343200  | -0.10487900 | -3.03434600 |
| H  | 3.20332600  | -0.24695300 | -2.67298400 |
| H  | 3.00130900  | 1.54230100  | -0.95175800 |
| H  | 2.55059300  | 2.10797500  | -2.56071900 |
| H  | 1.71328300  | 3.83426800  | -0.75019600 |
| H  | 0.23100300  | 3.37151600  | 0.13559800  |
| H  | -3.83426800 | 1.71328300  | -0.75019600 |
| H  | -3.37151600 | 0.23100300  | 0.13559800  |
| H  | -1.71328300 | -3.83426800 | -0.75019600 |
| H  | -0.23100300 | -3.37151600 | 0.13559800  |
| H  | 3.83426800  | -1.71328300 | -0.75019600 |
| H  | 3.37151600  | -0.23100300 | 0.13559800  |

### Cm(DOTA)- SAP

|    |             |             |             |
|----|-------------|-------------|-------------|
| Cm | 0.00000000  | 0.00000000  | 0.66276300  |
| N  | 0.21729700  | 2.11575800  | -1.05516100 |
| N  | 2.11575800  | -0.21729700 | -1.05516100 |
| N  | -0.21729700 | -2.11575800 | -1.05516100 |
| N  | -2.11575800 | 0.21729700  | -1.05516100 |
| O  | -1.26275800 | 1.92252000  | 1.31663800  |
| O  | 1.92252000  | 1.26275800  | 1.31663800  |
| O  | 1.26275800  | -1.92252000 | 1.31663800  |
| O  | -1.92252000 | -1.26275800 | 1.31663800  |
| O  | 4.09182400  | 1.85528000  | 1.10703200  |
| O  | 1.85528000  | -4.09182400 | 1.10703200  |
| O  | -4.09182400 | -1.85528000 | 1.10703200  |
| O  | -1.85528000 | 4.09182400  | 1.10703200  |
| C  | -1.15859400 | 3.11391500  | 0.83447600  |
| C  | 3.11391500  | 1.15859400  | 0.83447600  |
| C  | 1.15859400  | -3.11391500 | 0.83447600  |
| C  | -3.11391500 | -1.15859400 | 0.83447600  |
| C  | 1.57469100  | 2.16914500  | -1.64865700 |
| C  | 2.06152000  | 0.80174600  | -2.12620900 |
| C  | 2.16914500  | -1.57469100 | -1.64865700 |
| C  | 0.80174600  | -2.06152000 | -2.12620900 |
| C  | -1.57469100 | -2.16914500 | -1.64865700 |
| C  | -2.06152000 | -0.80174600 | -2.12620900 |
| C  | -2.16914500 | 1.57469100  | -1.64865700 |
| C  | -0.80174600 | 2.06152000  | -2.12620900 |
| C  | 0.00000000  | 3.29673900  | -0.17301600 |
| C  | 3.29673900  | 0.00000000  | -0.17301600 |
| C  | 0.00000000  | -3.29673900 | -0.17301600 |
| C  | -3.29673900 | 0.00000000  | -0.17301600 |
| H  | 0.90522800  | 3.41589400  | 0.42867100  |
| H  | -0.16372500 | 4.20502800  | -0.76914300 |
| H  | 4.20502800  | 0.16372500  | -0.76914300 |
| H  | 3.41589400  | -0.90522800 | 0.42867100  |
| H  | 0.16372500  | -4.20502800 | -0.76914300 |
| H  | -0.90522800 | -3.41589400 | 0.42867100  |
| H  | -3.41589400 | 0.90522800  | 0.42867100  |
| H  | -4.20502800 | -0.16372500 | -0.76914300 |
| H  | 2.25347300  | 2.56076800  | -0.89145100 |
| H  | 1.60168500  | 2.86809800  | -2.50168900 |
| H  | 3.05778200  | 0.92442000  | -2.58341100 |
| H  | 1.39762000  | 0.42787600  | -2.91207400 |
| H  | 2.86809800  | -1.60168500 | -2.50168900 |
| H  | 2.56076800  | -2.25347300 | -0.89145100 |
| H  | 0.92442000  | -3.05778200 | -2.58341100 |
| H  | 0.42787600  | -1.39762000 | -2.91207400 |
| H  | -1.60168500 | -2.86809800 | -2.50168900 |
| H  | -2.25347300 | -2.56076800 | -0.89145100 |
| H  | -1.39762000 | -0.42787600 | -2.91207400 |
| H  | -3.05778200 | -0.92442000 | -2.58341100 |
| H  | -2.56076800 | 2.25347300  | -0.89145100 |
| H  | -2.86809800 | 1.60168500  | -2.50168900 |
| H  | -0.42787600 | 1.39762000  | -2.91207400 |
| H  | -0.92442000 | 3.05778200  | -2.58341100 |

### Cm(DOTA)- TSAP

|    |             |             |             |
|----|-------------|-------------|-------------|
| Cm | 0.00000000  | 0.00000000  | 0.61364800  |
| N  | 0.95568300  | 1.87788000  | -1.16490700 |
| N  | -1.87788000 | 0.95568300  | -1.16490700 |
| N  | -0.95568300 | -1.87788000 | -1.16490700 |
| N  | 1.87788000  | -0.95568300 | -1.16490700 |
| O  | 1.80850500  | 1.37426400  | 1.36081100  |
| O  | -1.37426400 | 1.80850500  | 1.36081100  |
| O  | -1.80850500 | -1.37426400 | 1.36081100  |
| O  | 1.37426400  | -1.80850500 | 1.36081100  |
| O  | 2.79453400  | 3.40630300  | 1.48436500  |
| O  | -3.40630300 | 2.79453400  | 1.48436500  |
| O  | -2.79453400 | -3.40630300 | 1.48436500  |
| O  | 3.40630300  | -2.79453400 | 1.48436500  |
| C  | 2.02708900  | 2.58918000  | 0.98270700  |
| C  | -2.58918000 | 2.02708900  | 0.98270700  |
| C  | -2.02708900 | -2.58918000 | 0.98270700  |
| C  | 2.58918000  | -2.02708900 | 0.98270700  |
| C  | 0.00000000  | 2.22064000  | -2.23509700 |
| C  | -1.44191700 | 2.24995200  | -1.73789700 |
| C  | -2.22064000 | 0.00000000  | -2.23509700 |
| C  | -2.24995200 | -1.44191700 | -1.73789700 |
| C  | 0.00000000  | -2.22064000 | -2.23509700 |
| C  | 1.44191700  | -2.24995200 | -1.73789700 |
| C  | 2.22064000  | 0.00000000  | -2.23509700 |
| C  | 2.24995200  | 1.44191700  | -1.73789700 |
| C  | 1.19821400  | 3.02644000  | -0.25168500 |
| C  | -3.02644000 | 1.19821400  | -0.25168500 |
| C  | -1.19821400 | -3.02644000 | -0.25168500 |
| C  | 3.02644000  | -1.19821400 | -0.25168500 |
| H  | 0.10442900  | 1.47794600  | -3.03286000 |
| H  | 0.24575000  | 3.19943900  | -2.68070000 |
| H  | -1.54163800 | 3.00310500  | -0.95454600 |
| H  | -2.10651200 | 2.55319900  | -2.56409900 |
| H  | -1.47794600 | 0.10442900  | -3.03286000 |
| H  | -3.19943900 | 0.24575000  | -2.68070000 |
| H  | -3.00310500 | -1.54163800 | -0.95454600 |
| H  | -2.55319900 | -2.10651200 | -2.56409900 |
| H  | -0.10442900 | -1.47794600 | -3.03286000 |
| H  | -0.24575000 | -3.19943900 | -2.68070000 |
| H  | 1.54163800  | -3.00310500 | -0.95454600 |
| H  | 2.10651200  | -2.55319900 | -2.56409900 |
| H  | 1.47794600  | -0.10442900 | -3.03286000 |
| H  | 3.19943900  | -0.24575000 | -2.68070000 |
| H  | 3.00310500  | 1.54163800  | -0.95454600 |
| H  | 2.55319900  | 2.10651200  | -2.56409900 |
| H  | 1.71046100  | 3.84628600  | -0.77480300 |
| H  | 0.23635600  | 3.38550100  | 0.12422900  |
| H  | -3.84628600 | 1.71046100  | -0.77480300 |
| H  | -3.38550100 | 0.23635600  | 0.12422900  |
| H  | -1.71046100 | -3.84628600 | -0.77480300 |
| H  | -0.23635600 | -3.38550100 | 0.12422900  |
| H  | 3.84628600  | -1.71046100 | -0.77480300 |
| H  | 3.38550100  | -0.23635600 | 0.12422900  |

**La(DOTA)<sup>-</sup> SAP**

|    |             |             |             |
|----|-------------|-------------|-------------|
| La | 0.00000000  | 0.00000000  | 0.83681500  |
| N  | 0.21458700  | 2.13002800  | -0.96307600 |
| N  | 2.13002800  | -0.21458700 | -0.96307600 |
| N  | -0.21458700 | -2.13002800 | -0.96307600 |
| N  | -2.13002800 | 0.21458700  | -0.96307600 |
| O  | -1.27669600 | 1.99555200  | 1.40464000  |
| O  | 1.99555200  | 1.27669600  | 1.40464000  |
| O  | 1.27669600  | -1.99555200 | 1.40464000  |
| O  | -1.99555200 | -1.27669600 | 1.40464000  |
| O  | 4.16254300  | 1.86172900  | 1.14261000  |
| O  | 1.86172900  | -4.16254300 | 1.14261000  |
| O  | -4.16254300 | -1.86172900 | 1.14261000  |
| O  | -1.86172900 | 4.16254300  | 1.14261000  |
| C  | -1.16773200 | 3.17627900  | 0.89603300  |
| C  | 3.17627900  | 1.16773200  | 0.89603300  |
| C  | 1.16773200  | -3.17627900 | 0.89603300  |
| C  | -3.17627900 | -1.16773200 | 0.89603300  |
| C  | 1.57187400  | 2.17324800  | -1.55776400 |
| C  | 2.05719600  | 0.80424700  | -2.03325000 |
| C  | 2.17324800  | -1.57187400 | -1.55776400 |
| C  | 0.80424700  | -2.05719600 | -2.03325000 |
| C  | -1.57187400 | -2.17324800 | -1.55776400 |
| C  | -2.05719600 | -0.80424700 | -2.03325000 |
| C  | -2.17324800 | 1.57187400  | -1.55776400 |
| C  | -0.80424700 | 2.05719600  | -2.03325000 |
| C  | 0.00000000  | 3.32853500  | -0.10634300 |
| C  | 3.32853500  | 0.00000000  | -0.10634300 |
| C  | 0.00000000  | -3.32853500 | -0.10634300 |
| C  | -3.32853500 | 0.00000000  | -0.10634300 |
| H  | 0.90250600  | 3.45336100  | 0.49896600  |
| H  | -0.15061100 | 4.22747300  | -0.72047400 |
| H  | 4.22747300  | 0.15061100  | -0.72047400 |
| H  | 3.45336100  | -0.90250600 | 0.49896600  |
| H  | 0.15061100  | -4.22747300 | -0.72047400 |
| H  | -0.90250600 | -3.45336100 | 0.49896600  |
| H  | -3.45336100 | 0.90250600  | 0.49896600  |
| H  | -4.22747300 | -0.15061100 | -0.72047400 |
| H  | 2.25221800  | 2.56660900  | -0.80296200 |
| H  | 1.60122900  | 2.86861700  | -2.41425900 |
| H  | 3.04750300  | 0.93033000  | -2.50309400 |
| H  | 1.38679400  | 0.42640400  | -2.81132600 |
| H  | 2.86861700  | -1.60122900 | -2.41425900 |
| H  | 2.56660900  | -2.25221800 | -0.80296200 |
| H  | 0.93033000  | -3.04750300 | -2.50309400 |
| H  | 0.42640400  | -1.38679400 | -2.81132600 |
| H  | -1.60122900 | -2.86861700 | -2.41425900 |
| H  | -2.25221800 | -2.56660900 | -0.80296200 |
| H  | -1.38679400 | -0.42640400 | -2.81132600 |
| H  | -3.04750300 | -0.93033000 | -2.50309400 |
| H  | -2.56660900 | 2.25221800  | -0.80296200 |
| H  | -2.86861700 | 1.60122900  | -2.41425900 |
| H  | -0.42640400 | 1.38679400  | -2.81132600 |
| H  | -0.93033000 | 3.04750300  | -2.50309400 |

**La(DOTA)<sup>-</sup> TSAP**

|    |             |             |             |
|----|-------------|-------------|-------------|
| La | 0.00000000  | 0.00000000  | 0.77544600  |
| N  | 0.96200400  | 1.88992100  | -1.08397900 |
| N  | -1.88992100 | 0.96200400  | -1.08397900 |
| N  | -0.96200400 | -1.88992100 | -1.08397900 |
| N  | 1.88992100  | -0.96200400 | -1.08397900 |
| O  | 1.83902400  | 1.44811200  | 1.44903400  |
| O  | -1.44811200 | 1.83902400  | 1.44903400  |
| O  | -1.83902400 | -1.44811200 | 1.44903400  |
| O  | 1.44811200  | -1.83902400 | 1.44903400  |
| O  | 2.80421500  | 3.49345900  | 1.52741400  |
| O  | -3.49345900 | 2.80421500  | 1.52741400  |
| O  | -2.80421500 | -3.49345900 | 1.52741400  |
| O  | 3.49345900  | -2.80421500 | 1.52741400  |
| C  | 2.04746100  | 2.65623800  | 1.04331200  |
| C  | -2.65623800 | 2.04746100  | 1.04331200  |
| C  | -2.04746100 | -2.65623800 | 1.04331200  |
| C  | 2.65623800  | -2.04746100 | 1.04331200  |
| C  | 0.00000000  | 2.21603000  | -2.15407400 |
| C  | -1.44215200 | 2.25197000  | -1.65660200 |
| C  | -2.21603000 | 0.00000000  | -2.15407400 |
| C  | -2.25197000 | -1.44215200 | -1.65660200 |
| C  | 0.00000000  | -2.21603000 | -2.15407400 |
| C  | 1.44215200  | -2.25197000 | -1.65660200 |
| C  | 2.21603000  | 0.00000000  | -2.15407400 |
| C  | 2.25197000  | 1.44215200  | -1.65660200 |
| C  | 1.20998000  | 3.05695100  | -0.19782600 |
| C  | -3.05695100 | 1.20998000  | -0.19782600 |
| C  | -1.20998000 | -3.05695100 | -0.19782600 |
| C  | 3.05695100  | -1.20998000 | -0.19782600 |
| H  | 0.10284100  | 1.46435500  | -2.94319500 |
| H  | 0.24253400  | 3.18942500  | -2.61388500 |
| H  | -1.53852900 | 3.00586500  | -0.87346100 |
| H  | -2.10308600 | 2.56042000  | -2.48446400 |
| H  | -1.46435500 | 0.10284100  | -2.94319500 |
| H  | -3.18942500 | 0.24253400  | -2.61388500 |
| H  | -3.00586500 | -1.53852900 | -0.87346100 |
| H  | -2.56042000 | -2.10308600 | -2.48446400 |
| H  | -0.10284100 | -1.46435500 | -2.94319500 |
| H  | -0.24253400 | -3.18942500 | -2.61388500 |
| H  | 1.53852900  | -3.00586500 | -0.87346100 |
| H  | 2.10308600  | -2.56042000 | -2.48446400 |
| H  | 1.46435500  | -0.10284100 | -2.94319500 |
| H  | 3.18942500  | -0.24253400 | -2.61388500 |
| H  | 3.00586500  | 1.53852900  | -0.87346100 |
| H  | 2.56042000  | 2.10308600  | -2.48446400 |
| H  | 1.71501700  | 3.86770600  | -0.74244400 |
| H  | 0.24942300  | 3.42416800  | 0.17476100  |
| H  | -3.86770600 | 1.71501700  | -0.74244400 |
| H  | -3.42416800 | 0.24942300  | 0.17476100  |
| H  | -1.71501700 | -3.86770600 | -0.74244400 |
| H  | -0.24942300 | -3.42416800 | 0.17476100  |
| H  | 3.86770600  | -1.71501700 | -0.74244400 |
| H  | 3.42416800  | -0.24942300 | 0.17476100  |

**Lu(DOTA)- SAP**

|    |             |             |             |
|----|-------------|-------------|-------------|
| Lu | 0.00000000  | 0.00000000  | 0.59892600  |
| N  | 0.22654700  | 2.08408500  | -0.99154400 |
| N  | 2.08408500  | -0.22654700 | -0.99154400 |
| N  | -0.22654700 | -2.08408500 | -0.99154400 |
| N  | -2.08408500 | 0.22654700  | -0.99154400 |
| O  | -1.19341400 | 1.73965000  | 1.35512500  |
| O  | 1.73965000  | 1.19341400  | 1.35512500  |
| O  | 1.19341400  | -1.73965000 | 1.35512500  |
| O  | -1.73965000 | -1.19341400 | 1.35512500  |
| O  | 3.91176300  | 1.80723100  | 1.33794100  |
| O  | 1.80723100  | -3.91176300 | 1.33794100  |
| O  | -3.91176300 | -1.80723100 | 1.33794100  |
| O  | -1.80723100 | 3.91176300  | 1.33794100  |
| C  | -1.11347100 | 2.96571300  | 0.96492900  |
| C  | 2.96571300  | 1.11347100  | 0.96492900  |
| C  | 1.11347100  | -2.96571300 | 0.96492900  |
| C  | -2.96571300 | -1.11347100 | 0.96492900  |
| C  | 1.58359400  | 2.15471100  | -1.58099700 |
| C  | 2.06486500  | 0.78974600  | -2.06511300 |
| C  | 2.15471100  | -1.58359400 | -1.58099700 |
| C  | 0.78974600  | -2.06486500 | -2.06511300 |
| C  | -1.58359400 | -2.15471100 | -1.58099700 |
| C  | -2.06486500 | -0.78974600 | -2.06511300 |
| C  | -2.15471100 | 1.58359400  | -1.58099700 |
| C  | -0.78974600 | 2.06486500  | -2.06511300 |
| C  | 0.00000000  | 3.23179500  | -0.06954700 |
| C  | 3.23179500  | 0.00000000  | -0.06954700 |
| C  | 0.00000000  | -3.23179500 | -0.06954700 |
| C  | -3.23179500 | 0.00000000  | -0.06954700 |
| H  | 0.91641500  | 3.36745900  | 0.50966400  |
| H  | -0.21795000 | 4.15081700  | -0.63049600 |
| H  | 4.15081700  | 0.21795000  | -0.63049600 |
| H  | 3.36745900  | -0.91641500 | 0.50966400  |
| H  | 0.21795000  | -4.15081700 | -0.63049600 |
| H  | -0.91641500 | -3.36745900 | 0.50966400  |
| H  | -3.36745900 | 0.91641500  | 0.50966400  |
| H  | -4.15081700 | -0.21795000 | -0.63049600 |
| H  | 2.26096300  | 2.53694000  | -0.81734800 |
| H  | 1.61150300  | 2.86398600  | -2.42496800 |
| H  | 3.07013400  | 0.90059400  | -2.50523700 |
| H  | 1.40772700  | 0.42654500  | -2.86191300 |
| H  | 2.86398600  | -1.61150300 | -2.42496800 |
| H  | 2.53694000  | -2.26096300 | -0.81734800 |
| H  | 0.90059400  | -3.07013400 | -2.50523700 |
| H  | 0.42654500  | -1.40772700 | -2.86191300 |
| H  | -1.61150300 | -2.86398600 | -2.42496800 |
| H  | -2.26096300 | -2.53694000 | -0.81734800 |
| H  | -1.40772700 | -0.42654500 | -2.86191300 |
| H  | -3.07013400 | -0.90059400 | -2.50523700 |
| H  | -2.53694000 | 2.26096300  | -0.81734800 |
| H  | -2.86398600 | 1.61150300  | -2.42496800 |
| H  | -0.42654500 | 1.40772700  | -2.86191300 |
| H  | -0.90059400 | 3.07013400  | -2.50523700 |

**Lu(DOTA)- TSAP**

|    |             |             |             |
|----|-------------|-------------|-------------|
| Lu | 0.00000000  | 0.00000000  | 0.55770900  |
| N  | 0.19072100  | 2.06901000  | -1.09753300 |
| N  | -2.06901000 | 0.19072100  | -1.09753300 |
| N  | -0.19072100 | -2.06901000 | -1.09753300 |
| N  | 2.06901000  | -0.19072100 | -1.09753300 |
| O  | 1.13590500  | 1.75149100  | 1.37824000  |
| O  | -1.75149100 | 1.13590500  | 1.37824000  |
| O  | -1.13590500 | -1.75149100 | 1.37824000  |
| O  | 1.75149100  | -1.13590500 | 1.37824000  |
| O  | 1.33566200  | 3.98401800  | 1.67630400  |
| O  | -3.98401800 | 1.33566200  | 1.67630400  |
| O  | -1.33566200 | -3.98401800 | 1.67630400  |
| O  | 3.98401800  | -1.33566200 | 1.67630400  |
| C  | 0.90970700  | 2.99116300  | 1.09357000  |
| C  | -2.99116300 | 0.90970700  | 1.09357000  |
| C  | -0.90970700 | -2.99116300 | 1.09357000  |
| C  | 2.99116300  | -0.90970700 | 1.09357000  |
| C  | -0.82198800 | 2.06843800  | -2.16809500 |
| C  | -2.16610000 | 1.55347200  | -1.66915700 |
| C  | -2.06843800 | -0.82198800 | -2.16809500 |
| C  | -1.55347200 | -2.16610000 | -1.66915700 |
| C  | 0.82198800  | -2.06843800 | -2.16809500 |
| C  | 2.16610000  | -1.55347200 | -1.66915700 |
| C  | 2.06843800  | 0.82198800  | -2.16809500 |
| C  | 1.55347200  | 2.16610000  | -1.66915700 |
| C  | 0.00000000  | 3.19108300  | -0.14159000 |
| C  | -3.19108300 | 0.00000000  | -0.14159000 |
| C  | 0.00000000  | -3.19108300 | -0.14159000 |
| C  | 3.19108300  | 0.00000000  | -0.14159000 |
| H  | -0.45538200 | 1.43153800  | -2.98040000 |
| H  | -0.95243800 | 3.07897300  | -2.59066600 |
| H  | -2.53881700 | 2.21262200  | -0.88339500 |
| H  | -2.90199100 | 1.58087300  | -2.48962500 |
| H  | -1.43153800 | -0.45538200 | -2.98040000 |
| H  | -3.07897300 | -0.95243800 | -2.59066600 |
| H  | -2.21262200 | -2.53881700 | -0.88339500 |
| H  | -1.58087300 | -2.90199100 | -2.48962500 |
| H  | 0.45538200  | -1.43153800 | -2.98040000 |
| H  | 0.95243800  | -3.07897300 | -2.59066600 |
| H  | 2.53881700  | -2.21262200 | -0.88339500 |
| H  | 2.90199100  | -1.58087300 | -2.48962500 |
| H  | 1.43153800  | 0.45538200  | -2.98040000 |
| H  | 3.07897300  | 0.95243800  | -2.59066600 |
| H  | 2.21262200  | 2.53881700  | -0.88339500 |
| H  | 1.58087300  | 2.90199100  | -2.48962500 |
| H  | 0.21210600  | 4.15927900  | -0.61653200 |
| H  | -1.03070500 | 3.18074900  | 0.21929100  |
| H  | -4.15927900 | 0.21210600  | -0.61653200 |
| H  | -3.18074900 | -1.03070500 | 0.21929100  |
| H  | -0.21210600 | -4.15927900 | -0.61653200 |
| H  | 1.03070500  | -3.18074900 | 0.21929100  |
| H  | 4.15927900  | -0.21210600 | -0.61653200 |
| H  | 3.18074900  | 1.03070500  | 0.21929100  |

### Np(DOTA)- SAP

|    |             |             |             |
|----|-------------|-------------|-------------|
| Np | 0.00000000  | 0.00000000  | 0.72397600  |
| N  | 0.21448000  | 2.12705200  | -1.05702200 |
| N  | 2.12705200  | -0.21448000 | -1.05702200 |
| N  | -0.21448000 | -2.12705200 | -1.05702200 |
| N  | -2.12705200 | 0.21448000  | -1.05702200 |
| O  | -1.28232400 | 1.99142000  | 1.31679700  |
| O  | 1.99142000  | 1.28232400  | 1.31679700  |
| O  | 1.28232400  | -1.99142000 | 1.31679700  |
| O  | -1.99142000 | -1.28232400 | 1.31679700  |
| O  | 4.15637100  | 1.86787000  | 1.04343000  |
| O  | 1.86787000  | -4.15637100 | 1.04343000  |
| O  | -4.15637100 | -1.86787000 | 1.04343000  |
| O  | -1.86787000 | 4.15637100  | 1.04343000  |
| C  | -1.17131300 | 3.16962800  | 0.80440300  |
| C  | 3.16962800  | 1.17131300  | 0.80440300  |
| C  | 1.17131300  | -3.16962800 | 0.80440300  |
| C  | -3.16962800 | -1.17131300 | 0.80440300  |
| C  | 1.57187000  | 2.17324500  | -1.65190300 |
| C  | 2.05887600  | 0.80476200  | -2.12745700 |
| C  | 2.17324500  | -1.57187000 | -1.65190300 |
| C  | 0.80476200  | -2.05887600 | -2.12745700 |
| C  | -1.57187000 | -2.17324500 | -1.65190300 |
| C  | -2.05887600 | -0.80476200 | -2.12745700 |
| C  | -2.17324500 | 1.57187000  | -1.65190300 |
| C  | -0.80476200 | 2.05887600  | -2.12745700 |
| C  | 0.00000000  | 3.32273500  | -0.19445600 |
| C  | 3.32273500  | 0.00000000  | -0.19445600 |
| C  | 0.00000000  | -3.32273500 | -0.19445600 |
| C  | -3.32273500 | 0.00000000  | -0.19445600 |
| H  | 0.90165200  | 3.44236000  | 0.41305600  |
| H  | -0.14772800 | 4.22368800  | -0.80594100 |
| H  | 4.22368800  | 0.14772800  | -0.80594100 |
| H  | 3.44236000  | -0.90165200 | 0.41305600  |
| H  | 0.14772800  | -4.22368800 | -0.80594100 |
| H  | -0.90165200 | -3.44236000 | 0.41305600  |
| H  | -3.44236000 | 0.90165200  | 0.41305600  |
| H  | -4.22368800 | -0.14772800 | -0.80594100 |
| H  | 2.25161100  | 2.56723900  | -0.89689500 |
| H  | 1.59936300  | 2.86887500  | -2.50791200 |
| H  | 3.05098700  | 0.93069700  | -2.59291900 |
| H  | 1.39096900  | 0.42735400  | -2.90800700 |
| H  | 2.86887500  | -1.59936300 | -2.50791200 |
| H  | 2.56723900  | -2.25161100 | -0.89689500 |
| H  | 0.93069700  | -3.05098700 | -2.59291900 |
| H  | 0.42735400  | -1.39096900 | -2.90800700 |
| H  | -1.59936300 | -2.86887500 | -2.50791200 |
| H  | -2.25161100 | -2.56723900 | -0.89689500 |
| H  | -1.39096900 | -0.42735400 | -2.90800700 |
| H  | -3.05098700 | -0.93069700 | -2.59291900 |
| H  | -2.56723900 | 2.25161100  | -0.89689500 |
| H  | -2.86887500 | 1.59936300  | -2.50791200 |
| H  | -0.42735400 | 1.39096900  | -2.90800700 |
| H  | -0.93069700 | 3.05098700  | -2.59291900 |

### Np(DOTA)- TSAP

|    |             |             |             |
|----|-------------|-------------|-------------|
| Np | 0.00000000  | 0.00000000  | 0.66966500  |
| N  | 0.96075900  | 1.88735800  | -1.17023000 |
| N  | -1.88735800 | 0.96075900  | -1.17023000 |
| N  | -0.96075900 | -1.88735800 | -1.17023000 |
| N  | 1.88735800  | -0.96075900 | -1.17023000 |
| O  | 1.84373100  | 1.44011800  | 1.36659400  |
| O  | -1.44011800 | 1.84373100  | 1.36659400  |
| O  | -1.84373100 | -1.44011800 | 1.36659400  |
| O  | 1.44011800  | -1.84373100 | 1.36659400  |
| O  | 2.81310800  | 3.48343900  | 1.43633400  |
| O  | -3.48343900 | 2.81310800  | 1.43633400  |
| O  | -2.81310800 | -3.48343900 | 1.43633400  |
| O  | 3.48343900  | -2.81310800 | 1.43633400  |
| C  | 2.05081600  | 2.64714600  | 0.95887000  |
| C  | -2.64714600 | 2.05081600  | 0.95887000  |
| C  | -2.05081600 | -2.64714600 | 0.95887000  |
| C  | 2.64714600  | -2.05081600 | 0.95887000  |
| C  | 0.00000000  | 2.21754900  | -2.24054900 |
| C  | -1.44238400 | 2.25185600  | -1.74345900 |
| C  | -2.21754900 | 0.00000000  | -2.24054900 |
| C  | -2.25185600 | -1.44238400 | -1.74345900 |
| C  | 0.00000000  | -2.21754900 | -2.24054900 |
| C  | 1.44238400  | -2.25185600 | -1.74345900 |
| C  | 2.21754900  | 0.00000000  | -2.24054900 |
| C  | 2.25185600  | 1.44238400  | -1.74345900 |
| C  | 1.20762000  | 3.05148700  | -0.27812800 |
| C  | -3.05148700 | 1.20762000  | -0.27812800 |
| C  | -1.20762000 | -3.05148700 | -0.27812800 |
| C  | 3.05148700  | -1.20762000 | -0.27812800 |
| H  | 0.10351000  | 1.46821500  | -3.03191800 |
| H  | 0.24348500  | 3.19239900  | -2.69618000 |
| H  | -1.54004000 | 3.00565600  | -0.96044000 |
| H  | -2.10400500 | 2.55812400  | -2.57121600 |
| H  | -1.46821500 | 0.10351000  | -3.03191800 |
| H  | -3.19239900 | 0.24348500  | -2.69618000 |
| H  | -3.00565600 | -1.54004000 | -0.96044000 |
| H  | -2.55812400 | -2.10400500 | -2.57121600 |
| H  | -0.10351000 | -1.46821500 | -3.03191800 |
| H  | -0.24348500 | -3.19239900 | -2.69618000 |
| H  | 1.54004000  | -3.00565600 | -0.96044000 |
| H  | 2.10400500  | -2.55812400 | -2.57121600 |
| H  | 1.46821500  | -0.10351000 | -3.03191800 |
| H  | 3.19239900  | -0.24348500 | -2.69618000 |
| H  | 3.00565600  | 1.54004000  | -0.96044000 |
| H  | 2.55812400  | 2.10400500  | -2.57121600 |
| H  | 1.70928800  | 3.86526700  | -0.82088200 |
| H  | 0.24683900  | 3.41362100  | 0.09870700  |
| H  | -3.86526700 | 1.70928800  | -0.82088200 |
| H  | -3.41362100 | 0.24683900  | 0.09870700  |
| H  | -1.70928800 | -3.86526700 | -0.82088200 |
| H  | -0.24683900 | -3.41362100 | 0.09870700  |
| H  | 3.86526700  | -1.70928800 | -0.82088200 |
| H  | 3.41362100  | -0.24683900 | 0.09870700  |

**Pu(DOTA)<sup>-</sup> SAP**

|    |             |             |             |
|----|-------------|-------------|-------------|
| Pu | 0.00000000  | 0.00000000  | 0.70206200  |
| N  | 0.21537000  | 2.12309900  | -1.05604700 |
| N  | 2.12309900  | -0.21537000 | -1.05604700 |
| N  | -0.21537000 | -2.12309900 | -1.05604700 |
| N  | -2.12309900 | 0.21537000  | -1.05604700 |
| O  | -1.27634700 | 1.96766200  | 1.31736500  |
| O  | 1.96766200  | 1.27634700  | 1.31736500  |
| O  | 1.27634700  | -1.96766200 | 1.31736500  |
| O  | -1.96766200 | -1.27634700 | 1.31736500  |
| O  | 4.13407800  | 1.86453100  | 1.06481300  |
| O  | 1.86453100  | -4.13407800 | 1.06481300  |
| O  | -4.13407800 | 1.86453100  | 1.06481300  |
| O  | -1.86453100 | 4.13407800  | 1.06481300  |
| C  | -1.16756000 | 3.15030900  | 0.81496700  |
| C  | 3.15030900  | 1.16756000  | 0.81496700  |
| C  | 1.16756000  | -3.15030900 | 0.81496700  |
| C  | -3.15030900 | -1.16756000 | 0.81496700  |
| C  | 1.57273000  | 2.17196300  | -1.65055400 |
| C  | 2.05982700  | 0.80387200  | -2.12671100 |
| C  | 2.17196300  | -1.57273000 | -1.65055400 |
| C  | 0.80387200  | -2.05982700 | -2.12671100 |
| C  | -1.57273000 | -2.17196300 | -1.65055400 |
| C  | -2.05982700 | -0.80387200 | -2.12671100 |
| C  | -2.17196300 | 1.57273000  | -1.65055400 |
| C  | -0.80387200 | 2.05982700  | -2.12671100 |
| C  | 0.00000000  | 3.31356600  | -0.18634400 |
| C  | 3.31356600  | 0.00000000  | -0.18634400 |
| C  | 0.00000000  | -3.31356600 | -0.18634400 |
| C  | -3.31356600 | 0.00000000  | -0.18634400 |
| H  | 0.90269400  | 3.43230100  | 0.41960200  |
| H  | -0.15257500 | 4.21733200  | -0.79237700 |
| H  | 4.21733200  | 0.15257500  | -0.79237700 |
| H  | 3.43230100  | -0.90269400 | 0.41960200  |
| H  | 0.15257500  | -4.21733200 | -0.79237700 |
| H  | -0.90269400 | -3.43230100 | 0.41960200  |
| H  | -3.43230100 | 0.90269400  | 0.41960200  |
| H  | -4.21733200 | -0.15257500 | -0.79237700 |
| H  | 2.25216900  | 2.56539400  | -0.89495500 |
| H  | 1.59977400  | 2.86861300  | -2.50563500 |
| H  | 3.05345500  | 0.92872400  | -2.58911800 |
| H  | 1.39343200  | 0.42764100  | -2.90921100 |
| H  | 2.86861300  | -1.59977400 | -2.50563500 |
| H  | 2.56539400  | -2.25216900 | -0.89495500 |
| H  | 0.92872400  | -3.05345500 | -2.58911800 |
| H  | 0.42764100  | -1.39343200 | -2.90921100 |
| H  | -1.59977400 | -2.86861300 | -2.50563500 |
| H  | -2.25216900 | -2.56539400 | -0.89495500 |
| H  | -1.39343200 | -0.42764100 | -2.90921100 |
| H  | -3.05345500 | -0.92872400 | -2.58911800 |
| H  | -2.56539400 | 2.25216900  | -0.89495500 |
| H  | -2.86861300 | 1.59977400  | -2.50563500 |
| H  | -0.42764100 | 1.39343200  | -2.90921100 |
| H  | -0.92872400 | 3.05345500  | -2.58911800 |

**Pu(DOTA)<sup>-</sup> TSAP**

|    |             |             |             |
|----|-------------|-------------|-------------|
| Pu | 0.00000000  | 0.00000000  | 0.64965000  |
| N  | 0.95899000  | 1.88404600  | -1.16793300 |
| N  | -1.88404600 | 0.95899000  | -1.16793300 |
| N  | -0.95899000 | -1.88404600 | -1.16793300 |
| N  | 1.88404600  | -0.95899000 | -1.16793300 |
| O  | 1.83176500  | 1.41757400  | 1.36568000  |
| O  | -1.41757400 | 1.83176500  | 1.36568000  |
| O  | -1.83176500 | -1.41757400 | 1.36568000  |
| O  | 1.41757400  | -1.83176500 | 1.36568000  |
| O  | 2.80930900  | 3.45604500  | 1.45140000  |
| O  | -3.45604500 | 2.80930900  | 1.45140000  |
| O  | -2.80930900 | -3.45604500 | 1.45140000  |
| O  | 3.45604500  | -2.80930900 | 1.45140000  |
| C  | 2.04348200  | 2.62690100  | 0.96706600  |
| C  | -2.62690100 | 2.04348200  | 0.96706600  |
| C  | -2.04348200 | -2.62690100 | 0.96706600  |
| C  | 2.62690100  | -2.04348200 | 0.96706600  |
| C  | 0.00000000  | 2.21846200  | -2.23822000 |
| C  | -1.44222300 | 2.25112800  | -1.74113700 |
| C  | -2.21846200 | 0.00000000  | -2.23822000 |
| C  | -2.25112800 | -1.44222300 | -1.74113700 |
| C  | 0.00000000  | -2.21846200 | -2.23822000 |
| C  | 1.44222300  | -2.25112800 | -1.74113700 |
| C  | 2.21846200  | 0.00000000  | -2.23822000 |
| C  | 2.25112800  | 1.44222300  | -1.74113700 |
| C  | 1.20411600  | 3.04274100  | -0.26831100 |
| C  | -3.04274100 | 1.20411600  | -0.26831100 |
| C  | -1.20411600 | -3.04274100 | -0.26831100 |
| C  | 3.04274100  | -1.20411600 | -0.26831100 |
| H  | 0.10383400  | 1.47132700  | -3.03173300 |
| H  | 0.24429700  | 3.19463600  | -2.69046600 |
| H  | -1.54064800 | 3.00490800  | -0.95821100 |
| H  | -2.10480000 | 2.55622800  | -2.56845900 |
| H  | -1.47132700 | 0.10383400  | -3.03173300 |
| H  | -3.19463600 | 0.24429700  | -2.69046600 |
| H  | -3.00490800 | -1.54064800 | -0.95821100 |
| H  | -2.55622800 | -2.10480000 | -2.56845900 |
| H  | -0.10383400 | -1.47132700 | -3.03173300 |
| H  | -0.24429700 | -3.19463600 | -2.69046600 |
| H  | 1.54064800  | -3.00490800 | -0.95821100 |
| H  | 2.10480000  | -2.55622800 | -2.56845900 |
| H  | 1.47132700  | -0.10383400 | -3.03173300 |
| H  | 3.19463600  | -0.24429700 | -2.69046600 |
| H  | 3.00490800  | 1.54064800  | -0.95821100 |
| H  | 2.55622800  | 2.10480000  | -2.56845900 |
| H  | 1.70869800  | 3.85914500  | -0.80428500 |
| H  | 0.24291700  | 3.40303300  | 0.10887700  |
| H  | -3.85914500 | 1.70869800  | -0.80428500 |
| H  | -3.40303300 | 0.24291700  | 0.10887700  |
| H  | -1.70869800 | -3.85914500 | -0.80428500 |
| H  | -0.24291700 | -3.40303300 | 0.10887700  |
| H  | 3.85914500  | -1.70869800 | -0.80428500 |
| H  | 3.40303300  | -0.24291700 | 0.10887700  |

**U(DOTA)- SAP**

|   |             |             |             |
|---|-------------|-------------|-------------|
| U | 0.00000000  | 0.00000000  | 0.74804400  |
| N | 0.21342100  | 2.13109700  | -1.05837400 |
| N | 2.13109700  | -0.21342100 | -1.05837400 |
| N | -0.21342100 | -2.13109700 | -1.05837400 |
| N | -2.13109700 | 0.21342100  | -1.05837400 |
| O | -1.28938800 | 2.01646100  | 1.31450000  |
| O | 2.01646100  | 1.28938800  | 1.31450000  |
| O | 1.28938800  | -2.01646100 | 1.31450000  |
| O | -2.01646100 | -1.28938800 | 1.31450000  |
| O | 4.18076400  | 1.86940400  | 1.02233100  |
| O | 1.86940400  | -4.18076400 | 1.02233100  |
| O | -4.18076400 | -1.86940400 | 1.02233100  |
| O | -1.86940400 | 4.18076400  | 1.02233100  |
| C | -1.17489400 | 3.19034900  | 0.79294700  |
| C | 3.19034900  | 1.17489400  | 0.79294700  |
| C | 1.17489400  | -3.19034900 | 0.79294700  |
| C | -3.19034900 | -1.17489400 | 0.79294700  |
| C | 1.57080000  | 2.17464200  | -1.65386300 |
| C | 2.05764300  | 0.80573200  | -2.12870900 |
| C | 2.17464200  | -1.57080000 | -1.65386300 |
| C | 0.80573200  | -2.05764300 | -2.12870900 |
| C | -1.57080000 | -2.17464200 | -1.65386300 |
| C | -2.05764300 | -0.80573200 | -2.12870900 |
| C | -2.17464200 | 1.57080000  | -1.65386300 |
| C | -0.80573200 | 2.05764300  | -2.12870900 |
| C | 0.00000000  | 3.33260900  | -0.20368600 |
| C | 3.33260900  | 0.00000000  | -0.20368600 |
| C | 0.00000000  | -3.33260900 | -0.20368600 |
| C | -3.33260900 | 0.00000000  | -0.20368600 |
| H | 0.90066700  | 3.45332200  | 0.40525900  |
| H | -0.14271000 | 4.23030000  | -0.82121200 |
| H | 4.23030000  | 0.14271000  | -0.82121200 |
| H | 3.45332200  | -0.90066700 | 0.40525900  |
| H | 0.14271000  | -4.23030000 | -0.82121200 |
| H | -0.90066700 | -3.45332200 | 0.40525900  |
| H | -3.45332200 | 0.90066700  | 0.40525900  |
| H | -4.23030000 | -0.14271000 | -0.82121200 |
| H | 2.25099600  | 2.56947000  | -0.89974600 |
| H | 1.59834500  | 2.86901100  | -2.51099500 |
| H | 3.04810400  | 0.93257200  | -2.59748200 |
| H | 1.38796100  | 0.42700100  | -2.90701500 |
| H | 2.86901100  | -1.59834500 | -2.51099500 |
| H | 2.56947000  | -2.25099600 | -0.89974600 |
| H | 0.93257200  | -3.04810400 | -2.59748200 |
| H | 0.42700100  | -1.38796100 | -2.90701500 |
| H | -1.59834500 | -2.86901100 | -2.51099500 |
| H | -2.25099600 | -2.56947000 | -0.89974600 |
| H | -1.38796100 | -0.42700100 | -2.90701500 |
| H | -3.04810400 | -0.93257200 | -2.59748200 |
| H | -2.56947000 | 2.25099600  | -0.89974600 |
| H | -2.86901100 | 1.59834500  | -2.51099500 |
| H | -0.42700100 | 1.38796100  | -2.90701500 |
| H | -0.93257200 | 3.04810400  | -2.59748200 |

**U(DOTA)- TSAP**

|   |             |             |             |
|---|-------------|-------------|-------------|
| U | 0.00000000  | 0.00000000  | 0.69239600  |
| N | 0.96268000  | 1.89112600  | -1.17231300 |
| N | -1.89112600 | 0.96268000  | -1.17231300 |
| N | -0.96268000 | -1.89112600 | -1.17231300 |
| N | 1.89112600  | -0.96268000 | -1.17231300 |
| O | 1.85450000  | 1.46609000  | 1.36838000  |
| O | -1.46609000 | 1.85450000  | 1.36838000  |
| O | -1.85450000 | -1.46609000 | 1.36838000  |
| O | 1.46609000  | -1.85450000 | 1.36838000  |
| O | 2.82214500  | 3.51106600  | 1.41612300  |
| O | -3.51106600 | 2.82214500  | 1.41612300  |
| O | -2.82214500 | -3.51106600 | 1.41612300  |
| O | 3.51106600  | -2.82214500 | 1.41612300  |
| C | 2.05963800  | 2.66918300  | 0.94871600  |
| C | -2.66918300 | 2.05963800  | 0.94871600  |
| C | -2.05963800 | -2.66918300 | 0.94871600  |
| C | 2.66918300  | -2.05963800 | 0.94871600  |
| C | 0.00000000  | 2.21612400  | -2.24271700 |
| C | -1.44254300 | 2.25245300  | -1.74569000 |
| C | -2.21612400 | 0.00000000  | -2.24271700 |
| C | -2.25245300 | -1.44254300 | -1.74569000 |
| C | 0.00000000  | -2.21612400 | -2.24271700 |
| C | 1.44254300  | -2.25245300 | -1.74569000 |
| C | 2.21612400  | 0.00000000  | -2.24271700 |
| C | 2.25245300  | 1.44254300  | -1.74569000 |
| C | 1.21146800  | 3.06151100  | -0.28901600 |
| C | -3.06151100 | 1.21146800  | -0.28901600 |
| C | -1.21146800 | -3.06151100 | -0.28901600 |
| C | 3.06151100  | -1.21146800 | -0.28901600 |
| H | 0.10318400  | 1.46402400  | -3.03138000 |
| H | 0.24267400  | 3.18925000  | -2.70253900 |
| H | -1.53939900 | 3.00678900  | -0.96306700 |
| H | -2.10304600 | 2.55979500  | -2.57405800 |
| H | -1.46402400 | 0.10318400  | -3.03138000 |
| H | -3.18925000 | 0.24267400  | -2.70253900 |
| H | -3.00678900 | -1.53939900 | -0.96306700 |
| H | -2.55979500 | -2.10304600 | -2.57405800 |
| H | -0.10318400 | -1.46402400 | -3.03138000 |
| H | -0.24267400 | -3.18925000 | -2.70253900 |
| H | 1.53939900  | -3.00678900 | -0.96306700 |
| H | 2.10304600  | -2.55979500 | -2.57405800 |
| H | 1.46402400  | -0.10318400 | -3.03138000 |
| H | 3.18925000  | -0.24267400 | -2.70253900 |
| H | 3.00678900  | 1.53939900  | -0.96306700 |
| H | 2.55979500  | 2.10304600  | -2.57405800 |
| H | 1.70972700  | 3.87232800  | -0.83942400 |
| H | 0.25126000  | 3.42559000  | 0.08777800  |
| H | -3.87232800 | 1.70972700  | -0.83942400 |
| H | -3.42559000 | 0.25126000  | 0.08777800  |
| H | -1.70972700 | -3.87232800 | -0.83942400 |
| H | -0.25126000 | -3.42559000 | 0.08777800  |
| H | 3.87232800  | -1.70972700 | -0.83942400 |
| H | 3.42559000  | -0.25126000 | 0.08777800  |

**Ac(DOTA)(H<sub>2</sub>O)<sup>-</sup> SAP**

|    |             |             |             |
|----|-------------|-------------|-------------|
| Ac | 0.00000000  | 0.00000000  | 0.74158700  |
| N  | 0.00000000  | 2.16359800  | -1.19474000 |
| N  | 2.16059400  | -0.00983700 | -1.19701900 |
| N  | 0.00000000  | -2.16359800 | -1.19474000 |
| N  | -2.16059400 | 0.00983700  | -1.19701900 |
| O  | -1.48107300 | 1.99020300  | 1.20364600  |
| O  | 1.97552200  | 1.54013800  | 1.12357500  |
| O  | 1.48107300  | -1.99020300 | 1.20364600  |
| O  | -1.97552200 | -1.54013800 | 1.12357500  |
| O  | 4.09208100  | 2.26926700  | 0.80633500  |
| O  | 2.20498100  | -4.10689100 | 0.88351700  |
| O  | -4.09208100 | -2.26926700 | 0.80633500  |
| O  | -2.20498100 | 4.10689100  | 0.88351700  |
| C  | -1.45531600 | 3.15604000  | 0.65422200  |
| C  | 3.14682000  | 1.50667600  | 0.59298600  |
| C  | 1.45531600  | -3.15604000 | 0.65422200  |
| C  | -3.14682000 | -1.50667600 | 0.59298600  |
| C  | 1.34370300  | 2.31018600  | -1.80393600 |
| C  | 1.94555500  | 0.98349400  | -2.27155400 |
| C  | 2.32621400  | -1.36236800 | -1.77869800 |
| C  | 1.01365600  | -1.98327200 | -2.25605300 |
| C  | -1.34370300 | -2.31018600 | -1.80393600 |
| C  | -1.94555500 | -0.98349400 | -2.27155400 |
| C  | -2.32621400 | 1.36236800  | -1.77869800 |
| C  | -1.01365600 | 1.98327200  | -2.25605300 |
| C  | -0.30871300 | 3.36022700  | -0.36645600 |
| C  | 3.36380000  | 0.33504200  | -0.39488500 |
| C  | 0.30871300  | -3.36022700 | -0.36645600 |
| C  | -3.36380000 | -0.33504200 | -0.39488500 |
| H  | 0.58520800  | 3.57375300  | 0.22737000  |
| H  | -0.53309400 | 4.22955800  | -1.00119300 |
| H  | 4.22156200  | 0.55441100  | -1.04722900 |
| H  | 3.60172400  | -0.53992400 | 0.21784800  |
| H  | 0.53309400  | -4.22955800 | -1.00119300 |
| H  | -0.58520800 | -3.57375300 | 0.22737000  |
| H  | -3.60172400 | 0.53992400  | 0.21784800  |
| H  | -4.22156200 | -0.55441100 | -1.04722900 |
| H  | 1.99461300  | 2.77349000  | -1.06365500 |
| H  | 1.30454800  | 2.99098500  | -2.67257000 |
| H  | 2.90128400  | 1.20077600  | -2.77977500 |
| H  | 1.28965200  | 0.53075100  | -3.02109300 |
| H  | 3.02537400  | -1.33756700 | -2.63343400 |
| H  | 2.77704800  | -1.99483200 | -1.01406200 |
| H  | 1.24409300  | -2.95486700 | -2.72639000 |
| H  | 0.57413600  | -1.35628600 | -3.03750700 |
| H  | -1.30454800 | -2.99098500 | -2.67257000 |
| H  | -1.99461300 | -2.77349000 | -1.06365500 |
| H  | -1.28965200 | -0.53075100 | -3.02109300 |
| H  | -2.90128400 | -1.20077600 | -2.77977500 |
| H  | -2.77704800 | 1.99483200  | -1.01406200 |
| H  | -3.02537400 | 1.33756700  | -2.63343400 |
| H  | -0.57413600 | 1.35628600  | -3.03750700 |
| H  | -1.24409300 | 2.95486700  | -2.72639000 |
| O  | 0.00000000  | 0.00000000  | 3.46755400  |
| H  | 0.40550300  | -0.66734700 | 4.03282000  |
| H  | -0.40550300 | 0.66734700  | 4.03282000  |

**Ac(DOTA)(H<sub>2</sub>O)<sup>-</sup> TSAP**

|    |             |             |             |
|----|-------------|-------------|-------------|
| Ac | 0.00000000  | 0.00000000  | 0.68851700  |
| N  | -0.97828200 | -1.90858900 | -1.31895600 |
| N  | 1.90077100  | -0.98029900 | -1.29900700 |
| N  | 0.97828200  | 1.90858900  | -1.31895600 |
| N  | -1.90077100 | 0.98029900  | -1.29900700 |
| O  | -1.95529700 | -1.54117600 | 1.18699400  |
| O  | 1.58259600  | -1.87893500 | 1.27504200  |
| O  | 1.95529700  | 1.54117600  | 1.18699400  |
| O  | -1.58259600 | 1.87893500  | 1.27504200  |
| O  | -2.87181700 | -3.61145700 | 1.20550000  |
| O  | 3.65611100  | -2.78349700 | 1.26584600  |
| O  | 2.87181700  | 3.61145700  | 1.20550000  |
| O  | -3.65611100 | 2.78349700  | 1.26584600  |
| C  | -2.12796100 | -2.74073000 | 0.75465800  |
| C  | 2.77114700  | -2.06102500 | 0.80987900  |
| C  | 2.12796100  | 2.74073000  | 0.75465800  |
| C  | -2.77114700 | 2.06102500  | 0.80987900  |
| C  | 0.00000000  | -2.22261300 | -2.37669200 |
| C  | 1.43695400  | -2.26816900 | -1.86107400 |
| C  | 2.19572900  | -0.01917800 | -2.37960300 |
| C  | 2.25195200  | 1.42934200  | -1.90072500 |
| C  | 0.00000000  | 2.22261300  | -2.37669200 |
| C  | -1.43695400 | 2.26816900  | -1.86107400 |
| C  | -2.19572900 | 0.01917800  | -2.37960300 |
| C  | -2.25195200 | -1.42934200 | -1.90072500 |
| C  | -1.25761400 | -3.09948500 | -0.47808500 |
| C  | 3.09920100  | -1.22830800 | -0.45752100 |
| C  | 1.25761400  | 3.09948500  | -0.47808500 |
| C  | -3.09920100 | 1.22830800  | -0.45752100 |
| H  | -0.09064100 | -1.46482000 | -3.16101300 |
| H  | -0.23547800 | -3.19142400 | -2.85075200 |
| H  | 1.51567900  | -3.01327400 | -1.06713500 |
| H  | 2.10160900  | -2.59657600 | -2.67937400 |
| H  | 1.42279300  | -0.12380600 | -3.14706400 |
| H  | 3.15519400  | -0.26585800 | -2.86711800 |
| H  | 3.01683500  | 1.52753500  | -1.12884400 |
| H  | 2.55985800  | 2.07149200  | -2.74443800 |
| H  | 0.09064100  | 1.46482000  | -3.16101300 |
| H  | 0.23547800  | 3.19142400  | -2.85075200 |
| H  | -1.51567900 | 3.01327400  | -1.06713500 |
| H  | -2.10160900 | 2.59657600  | -2.67937400 |
| H  | -1.42279300 | 0.12380600  | -3.14706400 |
| H  | -3.15519400 | 0.26585800  | -2.86711800 |
| H  | -3.01683500 | -1.52753500 | -1.12884400 |
| H  | -2.55985800 | -2.07149200 | -2.74443800 |
| H  | -1.75147000 | -3.89042900 | -1.06206900 |
| H  | -0.30882000 | -3.49039300 | -0.09790500 |
| H  | 3.88942000  | -1.73242700 | -1.03334200 |
| H  | 3.48150000  | -0.26538800 | -0.10582800 |
| H  | 1.75147000  | 3.89042900  | -1.06206900 |
| H  | 0.30882000  | 3.49039300  | -0.09790500 |
| H  | -3.88942000 | 1.73242700  | -1.03334200 |
| H  | -3.48150000 | 0.26538800  | -0.10582800 |
| O  | 0.00000000  | 0.00000000  | 3.38759500  |
| H  | -0.57928000 | 0.52752600  | 3.94913900  |
| H  | 0.57928000  | -0.52752600 | 3.94913900  |



**Am(DOTA)(H<sub>2</sub>O)<sup>-</sup> SAP**

|    |             |             |             |
|----|-------------|-------------|-------------|
| Am | 0.00000000  | 0.00000000  | 0.60751900  |
| N  | 0.00000000  | 2.13609800  | -1.16950500 |
| N  | 2.13682800  | -0.01393000 | -1.17122000 |
| N  | 0.00000000  | -2.13609800 | -1.16950500 |
| N  | -2.13682800 | 0.01393000  | -1.17122000 |
| O  | -1.44507200 | 1.84427200  | 1.23468600  |
| O  | 1.84246100  | 1.51475400  | 1.13270700  |
| O  | 1.44507200  | -1.84427200 | 1.23468600  |
| O  | -1.84246100 | -1.51475400 | 1.13270700  |
| O  | 3.96632800  | 2.25801400  | 0.92727100  |
| O  | 2.19080400  | -3.96513600 | 1.02781000  |
| O  | -3.96632800 | -2.25801400 | 0.92727100  |
| O  | -2.19080400 | 3.96513600  | 1.02781000  |
| C  | -1.43721000 | 3.03365600  | 0.73811300  |
| C  | 3.03783600  | 1.48984100  | 0.66214300  |
| C  | 1.43721000  | -3.03365600 | 0.73811300  |
| C  | -3.03783600 | -1.48984100 | 0.66214300  |
| C  | 1.34218500  | 2.30615200  | -1.77566100 |
| C  | 1.95212000  | 0.98507800  | -2.24632100 |
| C  | 2.32240900  | -1.36228500 | -1.75488300 |
| C  | 1.01326300  | -1.98433800 | -2.23506100 |
| C  | -1.34218500 | -2.30615200 | -1.77566100 |
| C  | -1.95212000 | -0.98507800 | -2.24632100 |
| C  | -2.32240900 | 1.36228500  | -1.75488300 |
| C  | -1.01326300 | 1.98433800  | -2.23506100 |
| C  | -0.31744000 | 3.29908900  | -0.29615500 |
| C  | 3.30956200  | 0.33103900  | -0.32420000 |
| C  | 0.31744000  | -3.29908900 | -0.29615500 |
| C  | -3.30956200 | -0.33103900 | -0.32420000 |
| H  | 0.58155000  | 3.50923500  | 0.28995400  |
| H  | -0.57400400 | 4.18251800  | -0.89753400 |
| H  | 4.18670200  | 0.56528700  | -0.94414300 |
| H  | 3.52940300  | -0.54679500 | 0.29017200  |
| H  | 0.57400400  | -4.18251800 | -0.89753400 |
| H  | -0.58155000 | -3.50923500 | 0.28995400  |
| H  | -3.52940300 | 0.54679500  | 0.29017200  |
| H  | -4.18670200 | -0.56528700 | -0.94414300 |
| H  | 1.98793700  | 2.77096800  | -1.03202000 |
| H  | 1.29556700  | 2.99150600  | -2.63955400 |
| H  | 2.91971500  | 1.20215300  | -2.73073200 |
| H  | 1.31016500  | 0.53896700  | -3.01232000 |
| H  | 3.02717700  | -1.32951700 | -2.60386300 |
| H  | 2.77199200  | -1.99374800 | -0.98849300 |
| H  | 1.23739800  | -2.96529800 | -2.68790400 |
| H  | 0.57911100  | -1.36542300 | -3.02640800 |
| H  | -1.29556700 | -2.99150600 | -2.63955400 |
| H  | -1.98793700 | -2.77096800 | -1.03202000 |
| H  | -1.31016500 | -0.53896700 | -3.01232000 |
| H  | -2.91971500 | -1.20215300 | -2.73073200 |
| H  | -2.77199200 | 1.99374800  | -0.98849300 |
| H  | -3.02717700 | 1.32951700  | -2.60386300 |
| H  | -0.57911100 | 1.36542300  | -3.02640800 |
| H  | -1.23739800 | 2.96529800  | -2.68790400 |
| O  | 0.00000000  | 0.00000000  | 3.15393200  |
| H  | 0.45580600  | -0.64319200 | 3.70742100  |
| H  | -0.45580600 | 0.64319200  | 3.70742100  |

**Am(DOTA)(H<sub>2</sub>O)<sup>-</sup> TSAP**

|    |             |             |             |
|----|-------------|-------------|-------------|
| Am | 0.00000000  | 0.00000000  | 0.56663700  |
| N  | 0.96572600  | 1.88444700  | -1.29334800 |
| N  | -1.87657800 | 0.97133600  | -1.26879500 |
| N  | -0.96572600 | -1.88444700 | -1.29334800 |
| N  | 1.87657800  | -0.97133600 | -1.26879500 |
| O  | 1.91668500  | 1.39352200  | 1.17515900  |
| O  | -1.42677000 | 1.82913700  | 1.28201400  |
| O  | -1.91668500 | -1.39352200 | 1.17515900  |
| O  | 1.42677000  | -1.82913700 | 1.28201400  |
| O  | 2.85102600  | 3.45017100  | 1.30716200  |
| O  | -3.48726500 | 2.75118500  | 1.39274400  |
| O  | -2.85102600 | -3.45017100 | 1.30716200  |
| O  | 3.48726500  | -2.75118500 | 1.39274400  |
| C  | 2.09537000  | 2.61438400  | 0.81126800  |
| C  | -2.63782400 | 2.02327800  | 0.88154700  |
| C  | -2.09537000 | -2.61438400 | 0.81126800  |
| C  | 2.63782400  | -2.02327800 | 0.88154700  |
| C  | 0.00000000  | 2.22704400  | -2.35210000 |
| C  | -1.43474400 | 2.26547500  | -1.83457500 |
| C  | -2.20284900 | 0.02255200  | -2.35052100 |
| C  | -2.24730300 | -1.42621100 | -1.87566200 |
| C  | 0.00000000  | -2.22704400 | -2.35210000 |
| C  | 1.43474400  | -2.26547500 | -1.83457500 |
| C  | 2.20284900  | -0.02255200 | -2.35052100 |
| C  | 2.24730300  | 1.42621100  | -1.87566200 |
| C  | 1.23278300  | 3.04215500  | -0.40264100 |
| C  | -3.03924900 | 1.21070500  | -0.37579900 |
| C  | -1.23278300 | -3.04215500 | -0.40264100 |
| C  | 3.03924900  | -1.21070500 | -0.37579900 |
| H  | 0.09037700  | 1.48205900  | -3.14928200 |
| H  | 0.24359700  | 3.20349300  | -2.80523900 |
| H  | -1.51565200 | 3.01102000  | -1.04164400 |
| H  | -2.10806200 | 2.58422700  | -2.64873900 |
| H  | -1.44666200 | 0.13149500  | -3.13452400 |
| H  | -3.17300700 | 0.27594100  | -2.81192400 |
| H  | -3.01199000 | -1.53204500 | -1.10510200 |
| H  | -2.54490800 | -2.07293200 | -2.71874400 |
| H  | -0.09037700 | -1.48205900 | -3.14928200 |
| H  | -0.24359700 | -3.20349300 | -2.80523900 |
| H  | 1.51565200  | -3.01102000 | -1.04164400 |
| H  | 2.10806200  | -2.58422700 | -2.64873900 |
| H  | 1.44666200  | -0.13149500 | -3.13452400 |
| H  | 3.17300700  | -0.27594100 | -2.81192400 |
| H  | 3.01199000  | 1.53204500  | -1.10510200 |
| H  | 2.54490800  | 2.07293200  | -2.71874400 |
| H  | 1.73176200  | 3.85672300  | -0.94774700 |
| H  | 0.28133500  | 3.41027300  | -0.00835900 |
| H  | -3.84837300 | 1.73066600  | -0.90888800 |
| H  | -3.40794600 | 0.24589700  | -0.01703700 |
| H  | -1.73176200 | -3.85672300 | -0.94774700 |
| H  | -0.28133500 | -3.41027300 | -0.00835900 |
| H  | 3.84837300  | -1.73066600 | -0.90888800 |
| H  | 3.40794600  | -0.24589700 | -0.01703700 |
| O  | 0.00000000  | 0.00000000  | 3.10033300  |
| H  | 0.53408900  | -0.58342700 | 3.64992200  |
| H  | -0.53408900 | 0.58342700  | 3.64992200  |

**Cf(DOTA)(H<sub>2</sub>O)- SAP**

|    |             |              |             |
|----|-------------|--------------|-------------|
| Cf | 0.00000000  | 0.00000000   | 0.56938900  |
| N  | 0.20826600  | 2.11518100   | -1.16648700 |
| N  | 2.11588300  | -0.22320500  | -1.16761500 |
| N  | -0.20826600 | -2.11518100  | -1.16648700 |
| N  | -2.11588300 | 0.22320500   | -1.16761500 |
| O  | -1.24662300 | 1.91691800   | 1.23006100  |
| O  | 1.92627600  | 1.31511300   | 1.12731000  |
| O  | 1.24662300  | -1.91691800  | 1.23006100  |
| O  | -1.92627600 | -1.31511300  | 1.12731000  |
| O  | 4.11456500  | 1.85489500   | 0.97584500  |
| O  | 1.78593100  | -4.10346100  | 1.08241700  |
| O  | -4.11456500 | -0.785489500 | 0.97584500  |
| O  | -1.78593100 | 4.10346100   | 1.08241700  |
| C  | -1.12834400 | 3.11172300   | 0.76104000  |
| C  | 3.12423000  | 1.17912400   | 0.68379400  |
| C  | 1.12834400  | -3.11172300  | 0.76104000  |
| C  | -3.12423000 | -1.17912400  | 0.68379400  |
| C  | 1.56071700  | 2.16185000   | -1.77078600 |
| C  | 2.04105000  | 0.78937500   | -2.24282100 |
| C  | 2.17574500  | -1.58194000  | -1.75205500 |
| C  | 0.81297200  | -2.07209800  | -2.23367900 |
| C  | -1.56071700 | -2.16185000  | -1.77078600 |
| C  | -2.04105000 | -0.78937500  | -2.24282100 |
| C  | -2.17574500 | 1.58194000   | -1.75205500 |
| C  | -0.81297200 | 2.07209800   | -2.23367900 |
| C  | 0.00000000  | 3.29283000   | -0.28045600 |
| C  | 3.30576400  | 0.00751300   | -0.30636100 |
| C  | 0.00000000  | -3.29283000  | -0.28045600 |
| C  | -3.30576400 | -0.00751300  | -0.30636100 |
| H  | 0.91757800  | 3.41929500   | 0.30032200  |
| H  | -0.18554800 | 4.20097500   | -0.87090600 |
| H  | 4.20747700  | 0.16637600   | -0.91474400 |
| H  | 3.43793300  | -0.88966600  | 0.30473500  |
| H  | 0.18554800  | -4.20097500  | -0.87090600 |
| H  | -0.91757800 | -3.41929500  | 0.30032200  |
| H  | -3.43793300 | 0.88966600   | 0.30473500  |
| H  | -4.20747700 | -0.16637600  | -0.91474400 |
| H  | 2.24704300  | 2.56105200   | -1.02535400 |
| H  | 1.57977500  | 2.85100900   | -2.63253000 |
| H  | 3.02926200  | 0.90998600   | -2.71911000 |
| H  | 1.36365100  | 0.41041200   | -3.01453200 |
| H  | 2.88270800  | -1.61600700  | -2.59896400 |
| H  | 2.56032100  | -2.25455300  | -0.98522500 |
| H  | 0.93691700  | -3.07256900  | -2.68231400 |
| H  | 0.44327700  | -1.41522000  | -3.02725800 |
| H  | -1.57977500 | -2.85100900  | -2.63253000 |
| H  | -2.24704300 | -2.56105200  | -1.02535400 |
| H  | -1.36365100 | -0.41041200  | -3.01453200 |
| H  | -3.02926200 | -0.90998600  | -2.71911000 |
| H  | -2.56032100 | 2.25455300   | -0.98522500 |
| H  | -2.88270800 | 1.61600700   | -2.59896400 |
| H  | -0.44327700 | 1.41522000   | -3.02725800 |
| H  | -0.93691700 | 3.07256900   | -2.68231400 |
| O  | 0.00000000  | 0.00000000   | 3.05573100  |
| H  | 0.40614700  | -0.67905800  | 3.60450000  |
| H  | -0.40614700 | 0.67905800   | 3.60450000  |

**Cf(DOTA)(H<sub>2</sub>O)- TSAP**

|    |             |             |             |
|----|-------------|-------------|-------------|
| Cf | 0.00000000  | 0.00000000  | 0.53381600  |
| N  | -1.88608000 | 0.94086100  | -1.28908600 |
| N  | -0.94800000 | -1.87800700 | -1.26342200 |
| N  | 1.88608000  | -0.94086100 | -1.28908600 |
| N  | 0.94800000  | 1.87800700  | -1.26342200 |
| O  | -1.36219300 | 1.87655600  | 1.16359000  |
| O  | -1.79062300 | -1.38993000 | 1.27106900  |
| O  | 1.36219300  | -1.87655600 | 1.16359000  |
| O  | 1.79062300  | 1.38993000  | 1.27106900  |
| O  | -3.42105300 | 2.79660900  | 1.34547100  |
| O  | -2.69875600 | -3.45253000 | 1.43426900  |
| O  | 3.42105300  | -2.79660900 | 1.34547100  |
| O  | 2.69875600  | 3.45253000  | 1.43426900  |
| C  | -2.59181500 | 2.04918300  | 0.82673600  |
| C  | -1.97856300 | -2.61149500 | 0.89911600  |
| C  | 2.59181500  | -2.04918300 | 0.82673600  |
| C  | 1.97856300  | 2.61149500  | 0.89911600  |
| C  | -2.22784100 | -0.02326500 | -2.34866400 |
| C  | -2.24842500 | -1.45743900 | -1.83089400 |
| C  | 0.00000000  | -2.20495300 | -2.34500800 |
| C  | 1.44866500  | -2.22996000 | -1.87056500 |
| C  | 2.22784100  | 0.02326500  | -2.34866400 |
| C  | 2.24842500  | 1.45743900  | -1.83089400 |
| C  | 0.00000000  | 2.20495300  | -2.34500800 |
| C  | -1.44866500 | 2.22996000  | -1.87056500 |
| C  | -3.03563000 | 1.19241900  | -0.38403500 |
| C  | -1.17450500 | -3.03163600 | -0.35608700 |
| C  | 3.03563000  | -1.19241900 | -0.38403500 |
| C  | 1.17450500  | 3.03163600  | -0.35608700 |
| H  | -1.48814400 | 0.07525900  | -3.14998200 |
| H  | -3.20930100 | 0.21260300  | -2.79494400 |
| H  | -2.99375100 | -1.54731800 | -1.03877000 |
| H  | -2.55625800 | -2.13690100 | -2.64394800 |
| H  | -0.11788900 | -1.45574400 | -3.13458400 |
| H  | -0.24508700 | -3.18120800 | -2.79781800 |
| H  | 1.56455300  | -2.99280100 | -1.09964300 |
| H  | 2.10054700  | -2.51835300 | -2.71270200 |
| H  | 1.48814400  | -0.07525900 | -3.14998200 |
| H  | 3.20930100  | -0.21260300 | -2.79494400 |
| H  | 2.99375100  | 1.54731800  | -1.03877000 |
| H  | 2.55625800  | 2.13690100  | -2.64394800 |
| H  | 0.11788900  | 1.45574400  | -3.13458400 |
| H  | 0.24508700  | 3.18120800  | -2.79781800 |
| H  | -1.56455300 | 2.99280100  | -1.09964300 |
| H  | -2.10054700 | 2.51835300  | -2.71270200 |
| H  | -3.85973200 | 1.69076400  | -0.91510000 |
| H  | -3.39135600 | 0.23646400  | 0.00978000  |
| H  | -1.69649700 | -3.84877100 | -0.87465600 |
| H  | -0.20622600 | -3.39127000 | 0.00151900  |
| H  | 3.85973200  | -1.69076400 | -0.91510000 |
| H  | 3.39135600  | -0.23646400 | 0.00978000  |
| H  | 1.69649700  | 3.84877100  | -0.87465600 |
| H  | 0.20622600  | 3.39127000  | 0.00151900  |
| O  | 0.00000000  | 0.00000000  | 3.01144000  |
| H  | 0.59383800  | 0.52650900  | 3.55686500  |
| H  | -0.59383800 | -0.52650900 | 3.55686500  |

**Cm(DOTA)(H<sub>2</sub>O)<sup>-</sup> SAP**

|    |             |             |             |
|----|-------------|-------------|-------------|
| Cm | 0.00000000  | 0.00000000  | 0.59329400  |
| N  | 0.20590900  | 2.12219600  | -1.16813500 |
| N  | 2.12209900  | -0.22014600 | -1.16947800 |
| N  | -0.20590900 | -2.12219600 | -1.16813500 |
| N  | -2.12209900 | 0.22014600  | -1.16947800 |
| O  | -1.25686900 | 1.95325700  | 1.23319300  |
| O  | 1.95957600  | 1.32599300  | 1.13162500  |
| O  | 1.25686900  | -1.95325700 | 1.23319300  |
| O  | -1.95957600 | -1.32599300 | 1.13162500  |
| O  | 4.14605600  | 1.86359800  | 0.94537100  |
| O  | 1.79685700  | -4.13713500 | 1.04672200  |
| O  | -4.14605600 | -1.86359800 | 0.94537100  |
| O  | -1.79685700 | 4.13713500  | 1.04672200  |
| C  | -1.13650800 | 3.14060900  | 0.74625800  |
| C  | 3.15090100  | 1.18774200  | 0.67070800  |
| C  | 1.13650800  | -3.14060900 | 0.74625800  |
| C  | -3.15090100 | -1.18774200 | 0.67070800  |
| C  | 1.55828500  | 2.16519000  | -1.77354000 |
| C  | 2.03902700  | 0.79217800  | -2.24463800 |
| C  | 2.17934500  | -1.57960100 | -1.75356500 |
| C  | 0.81662100  | -2.07222500 | -2.23423900 |
| C  | -1.55828500 | -2.16519000 | -1.77354000 |
| C  | -2.03902700 | -0.79217800 | -2.24463800 |
| C  | -2.17934500 | 1.57960100  | -1.75356500 |
| C  | -0.81662100 | 2.07222500  | -2.23423900 |
| C  | 0.00000000  | 3.30633100  | -0.28992500 |
| C  | 3.31846600  | 0.01088300  | -0.31691400 |
| C  | 0.00000000  | -3.30633100 | -0.28992500 |
| C  | -3.31846600 | -0.01088300 | -0.31691400 |
| H  | 0.91570900  | 3.42992600  | 0.29475200  |
| H  | -0.17543000 | 4.21207000  | -0.88720700 |
| H  | 4.21642500  | 0.16343700  | -0.93248100 |
| H  | 3.45204700  | -0.88477600 | 0.29639400  |
| H  | 0.17543000  | -4.21207000 | -0.88720700 |
| H  | -0.91570900 | -3.42992600 | 0.29475200  |
| H  | -3.45204700 | 0.88477600  | 0.29639400  |
| H  | -4.21642500 | -0.16343700 | -0.93248100 |
| H  | 2.24514000  | 2.56544600  | -1.02916700 |
| H  | 1.57745900  | 2.85280600  | -2.63661500 |
| H  | 3.02470300  | 0.91466300  | -2.72571700 |
| H  | 1.35925100  | 0.41082100  | -3.01300500 |
| H  | 2.88477600  | -1.61403100 | -2.60185400 |
| H  | 2.56561200  | -2.25160800 | -0.98712200 |
| H  | 0.94397000  | -3.07111300 | -2.68545800 |
| H  | 0.44479900  | -1.41496400 | -3.02644000 |
| H  | -1.57745900 | -2.85280600 | -2.63661500 |
| H  | -2.24514000 | -2.56544600 | -1.02916700 |
| H  | -1.35925100 | -0.41082100 | -3.01300500 |
| H  | -3.02470300 | -0.91466300 | -2.72571700 |
| H  | -2.56561200 | 2.25160800  | -0.98712200 |
| H  | -2.88477600 | 1.61403100  | -2.60185400 |
| H  | -0.44479900 | 1.41496400  | -3.02644000 |
| H  | -0.94397000 | 3.07111300  | -2.68545800 |
| O  | 0.00000000  | 0.00000000  | 3.11742400  |
| H  | 0.39680000  | -0.68239200 | 3.66923700  |
| H  | -0.39680000 | 0.68239200  | 3.66923700  |

**Cm(DOTA)(H<sub>2</sub>O)<sup>-</sup> TSAP**

|    |             |             |             |
|----|-------------|-------------|-------------|
| Cm | 0.00000000  | 0.00000000  | 0.55401700  |
| N  | 0.96360600  | 1.88139900  | -1.29129000 |
| N  | -1.87337200 | 0.97022200  | -1.26634300 |
| N  | -0.96360600 | -1.88139900 | -1.29129000 |
| N  | 1.87337200  | -0.97022200 | -1.26634300 |
| O  | 1.90761900  | 1.37488600  | 1.17167500  |
| O  | -1.40642500 | 1.82028300  | 1.27930400  |
| O  | -1.90761900 | -1.37488600 | 1.17167500  |
| O  | 1.40642500  | -1.82028300 | 1.27930400  |
| O  | 2.84511500  | 3.42879900  | 1.32094000  |
| O  | -3.46354700 | 2.74719700  | 1.40735400  |
| O  | -2.84511500 | -3.42879900 | 1.32094000  |
| O  | 3.46354700  | -2.74719700 | 1.40735400  |
| C  | 2.08945100  | 2.59795300  | 0.81676200  |
| C  | -2.62045700 | 2.01718800  | 0.88873900  |
| C  | -2.08945100 | -2.59795300 | 0.81676200  |
| C  | 2.62045700  | -2.01718800 | 0.88873900  |
| C  | 0.00000000  | 2.22762700  | -2.35048600 |
| C  | -1.43450900 | 2.26498700  | -1.83304800 |
| C  | -2.20356000 | 0.02278700  | -2.34788300 |
| C  | -2.24635100 | -1.42581000 | -1.87306700 |
| C  | 0.00000000  | -2.22762700 | -2.35048600 |
| C  | 1.43450900  | -2.26498700 | -1.83304800 |
| C  | 2.20356000  | -0.02278700 | -2.34788300 |
| C  | 2.24635100  | 1.42581000  | -1.87306700 |
| C  | 1.22937000  | 3.03499600  | -0.39504300 |
| C  | -3.03177500 | 1.20926500  | -0.36787100 |
| C  | -1.22937000 | -3.03499600 | -0.39504300 |
| C  | 3.03177500  | -1.20926500 | -0.36787100 |
| H  | 0.09064500  | 1.48424400  | -3.14919400 |
| H  | 0.24468400  | 3.20499100  | -2.80103900 |
| H  | -1.51597200 | 3.01092500  | -1.04055700 |
| H  | -2.10890300 | 2.58213200  | -2.64686700 |
| H  | -1.44960100 | 0.13212400  | -3.13403300 |
| H  | -3.17506200 | 0.27681300  | -2.80603700 |
| H  | -3.01065600 | -1.53237700 | -1.10222500 |
| H  | -2.54323000 | -2.07336000 | -2.71569400 |
| H  | -0.09064500 | -1.48424400 | -3.14919400 |
| H  | -0.24468400 | -3.20499100 | -2.80103900 |
| H  | 1.51597200  | -3.01092500 | -1.04055700 |
| H  | 2.10890300  | -2.58213200 | -2.64686700 |
| H  | 1.44960100  | -0.13212400 | -3.13403300 |
| H  | 3.17506200  | -0.27681300 | -2.80603700 |
| H  | 3.01065600  | 1.53237700  | -1.10222500 |
| H  | 2.54323000  | 2.07336000  | -2.71569400 |
| H  | 1.73040300  | 3.85161300  | -0.93510100 |
| H  | 0.27770400  | 3.40146500  | -0.00008200 |
| H  | -3.84195900 | 1.73297500  | -0.89558800 |
| H  | -3.40058000 | 0.24450500  | -0.00946200 |
| H  | -1.73040300 | -3.85161300 | -0.93510100 |
| H  | -0.27770400 | -3.40146500 | -0.00008200 |
| H  | 3.84195900  | -1.73297500 | -0.89558800 |
| H  | 3.40058000  | -0.24450500 | -0.00946200 |
| O  | 0.00000000  | 0.00000000  | 3.06712800  |
| H  | 0.52870300  | -0.58964100 | 3.61515700  |
| H  | -0.52870300 | 0.58964100  | 3.61515700  |

**La(DOTA)(H<sub>2</sub>O)<sup>-</sup> SAP**

|    |             |             |             |
|----|-------------|-------------|-------------|
| La | 0.00000000  | 0.00000000  | 0.73506000  |
| N  | 0.20205800  | 2.13667600  | -1.09497500 |
| N  | 2.13457500  | -0.21382900 | -1.09677800 |
| N  | -0.20205800 | -2.13667600 | -1.09497500 |
| N  | -2.13457500 | 0.21382900  | -1.09677800 |
| O  | -1.27401200 | 2.02011000  | 1.30069000  |
| O  | 2.01956600  | 1.33848200  | 1.20996400  |
| O  | 1.27401200  | -2.02011000 | 1.30069000  |
| O  | -2.01956600 | -1.33848200 | 1.20996400  |
| O  | 4.20362100  | 1.87181200  | 0.97642300  |
| O  | 1.80571600  | -4.20282500 | 1.06624400  |
| O  | -4.20362100 | -1.87181200 | 0.97642300  |
| O  | -1.80571600 | 4.20282500  | 1.06624400  |
| C  | -1.14720900 | 3.19787100  | 0.79187100  |
| C  | 3.20136000  | 1.19895300  | 0.72318900  |
| C  | 1.14720900  | -3.19787100 | 0.79187100  |
| C  | -3.20136000 | -1.19895300 | 0.72318900  |
| C  | 1.55390700  | 2.17115700  | -1.70249800 |
| C  | 2.03340700  | 0.79688200  | -2.17195300 |
| C  | 2.18523800  | -1.57451500 | -1.67974000 |
| C  | 0.82231800  | -2.07016200 | -2.15886500 |
| C  | -1.55390700 | -2.17115700 | -1.70249800 |
| C  | -2.03340700 | -0.79688200 | -2.17195300 |
| C  | -2.18523800 | 1.57451500  | -1.67974000 |
| C  | -0.82231800 | 2.07016200  | -2.15886500 |
| C  | 0.00000000  | 3.33563300  | -0.23743500 |
| C  | 3.34483900  | 0.01847100  | -0.26531400 |
| C  | 0.00000000  | -3.33563300 | -0.23743500 |
| C  | -3.34483900 | -0.01847100 | -0.26531400 |
| H  | 0.91298000  | 3.46096700  | 0.35179500  |
| H  | -0.16074300 | 4.23417000  | -0.85007300 |
| H  | 4.23337300  | 0.16554200  | -0.89615700 |
| H  | 3.48812200  | -0.87606200 | 0.34798700  |
| H  | 0.16074300  | -4.23417000 | -0.85007300 |
| H  | -0.91298000 | -3.46096700 | 0.35179500  |
| H  | -3.48812200 | 0.87606200  | 0.34798700  |
| H  | -4.23337300 | -0.16554200 | -0.89615700 |
| H  | 2.24244800  | 2.57242700  | -0.96017600 |
| H  | 1.57456000  | 2.85617700  | -2.56805300 |
| H  | 3.01287300  | 0.92219900  | -2.66544000 |
| H  | 1.34706600  | 0.41101300  | -2.93191900 |
| H  | 2.88774000  | -1.61089100 | -2.53088300 |
| H  | 2.57408300  | -2.24572900 | -0.91405400 |
| H  | 0.95587800  | -3.06461100 | -2.61856300 |
| H  | 0.44642400  | -1.41007600 | -2.94654100 |
| H  | -1.57456000 | -2.85617700 | -2.56805300 |
| H  | -2.24244800 | -2.57242700 | -0.96017600 |
| H  | -1.34706600 | -0.41101300 | -2.93191900 |
| H  | -3.01287300 | -0.92219900 | -2.66544000 |
| H  | -2.57408300 | 2.24572900  | -0.91405400 |
| H  | -2.88774000 | 1.61089100  | -2.53088300 |
| H  | -0.44642400 | 1.41007600  | -2.94654100 |
| H  | -0.95587800 | 3.06461100  | -2.61856300 |
| O  | 0.00000000  | 0.00000000  | 3.35876900  |
| H  | 0.37854800  | -0.68729800 | 3.91796800  |
| H  | -0.37854800 | 0.68729800  | 3.91796800  |

**La(DOTA)(H<sub>2</sub>O)<sup>-</sup> TSAP**

|    |             |             |             |
|----|-------------|-------------|-------------|
| La | 0.00000000  | 0.00000000  | 0.68245000  |
| N  | -1.90144900 | 0.95168100  | -1.22503300 |
| N  | -0.95622300 | -1.89473300 | -1.20277800 |
| N  | 1.90144900  | -0.95168100 | -1.22503300 |
| N  | 0.95622300  | 1.89473300  | -1.20277800 |
| O  | -1.45450600 | 1.91885000  | 1.25111100  |
| O  | -1.83350200 | -1.49177200 | 1.34997900  |
| O  | 1.45450600  | -1.91885000 | 1.25111100  |
| O  | 1.83350200  | 1.49177200  | 1.34997900  |
| O  | -3.53130900 | 2.81225000  | 1.36295500  |
| O  | -2.71614300 | -3.57171000 | 1.43747400  |
| O  | 3.53130900  | -2.81225000 | 1.36295500  |
| O  | 2.71614300  | 3.57171000  | 1.43747400  |
| C  | -2.67396400 | 2.07813700  | 0.87210900  |
| C  | -2.00629500 | -2.70154700 | 0.93604500  |
| C  | 2.67396400  | -2.07813700 | 0.87210900  |
| C  | 2.00629500  | 2.70154700  | 0.93604500  |
| C  | -2.22554800 | -0.02162700 | -2.28338900 |
| C  | -2.25256300 | -1.45752800 | -1.76701000 |
| C  | 0.00000000  | -2.20067900 | -2.28420100 |
| C  | 1.44889400  | -2.23505400 | -1.80767100 |
| C  | 2.22554800  | 0.02162700  | -2.28338900 |
| C  | 2.25256300  | 1.45752800  | -1.76701000 |
| C  | 0.00000000  | 2.20067900  | -2.28420100 |
| C  | -1.44889400 | 2.23505400  | -1.80767100 |
| C  | -3.07165500 | 1.21109800  | -0.34942600 |
| C  | -1.18652100 | -3.07139100 | -0.32668400 |
| C  | 3.07165500  | -1.21109800 | -0.34942600 |
| C  | 1.18652100  | 3.07139100  | -0.32668400 |
| H  | -1.47740000 | 0.07621600  | -3.07650200 |
| H  | -3.20190800 | 0.20999000  | -2.74344400 |
| H  | -2.99706700 | -1.54504300 | -0.97369800 |
| H  | -2.56839900 | -2.13059500 | -2.58295500 |
| H  | -0.11489600 | -1.43966100 | -3.06245700 |
| H  | -0.24156300 | -3.16958700 | -2.75501900 |
| H  | 1.55942100  | -2.99894200 | -1.03680900 |
| H  | 2.09733600  | -2.52953500 | -2.65091500 |
| H  | 1.47740000  | -0.07621600 | -3.07650200 |
| H  | 3.20190800  | -0.20999000 | -2.74344400 |
| H  | 2.99706700  | 1.54504300  | -0.97369800 |
| H  | 2.56839900  | 2.13059500  | -2.58295500 |
| H  | 0.11489600  | 1.43966100  | -3.06245700 |
| H  | 0.24156300  | 3.16958700  | -2.75501900 |
| H  | -1.55942100 | 2.99894200  | -1.03680900 |
| H  | -2.09733600 | 2.52953500  | -2.65091500 |
| H  | -3.88423800 | 1.70115700  | -0.90591900 |
| H  | -3.43803900 | 0.25662900  | 0.03977700  |
| H  | -1.69460300 | -3.87958100 | -0.87299900 |
| H  | -0.21843800 | -3.43584700 | 0.02829500  |
| H  | 3.88423800  | -1.70115700 | -0.90591900 |
| H  | 3.43803900  | -0.25662900 | 0.03977700  |
| H  | 1.69460300  | 3.87958100  | -0.87299900 |
| H  | 0.21843800  | 3.43584700  | 0.02829500  |
| O  | 0.00000000  | 0.00000000  | 3.28624500  |
| H  | 0.56061000  | 0.55269100  | 3.84174300  |
| H  | -0.56061000 | -0.55269100 | 3.84174300  |

**Lu(DOTA)(H<sub>2</sub>O)- SAP**

|    |             |             |             |
|----|-------------|-------------|-------------|
| Lu | 0.00000000  | 0.00000000  | 0.57098100  |
| N  | 0.21642300  | 2.08977100  | -1.10853600 |
| N  | 2.09217100  | -0.23399600 | -1.10845400 |
| N  | -0.21642300 | -2.08977100 | -1.10853600 |
| N  | -2.09217100 | 0.23399600  | -1.10845400 |
| O  | -1.20459400 | 1.79139800  | 1.25664800  |
| O  | 1.80576300  | 1.26777800  | 1.15677300  |
| O  | 1.20459400  | -1.79139800 | 1.25664800  |
| O  | -1.80576300 | -1.26777800 | 1.15677300  |
| O  | 3.99327000  | 1.82675100  | 1.13354000  |
| O  | 1.75030800  | -3.97995800 | 1.24960700  |
| O  | -3.99327000 | -1.82675100 | 1.13354000  |
| O  | -1.75030800 | 3.97995800  | 1.24960700  |
| C  | -1.09829500 | 3.01164700  | 0.85474800  |
| C  | 3.02673500  | 1.14714900  | 0.77748000  |
| C  | 1.09829500  | -3.01164700 | 0.85474800  |
| C  | -3.02673500 | -1.14714900 | 0.77748000  |
| C  | 1.56862200  | 2.14865100  | -1.70900600 |
| C  | 2.04486600  | 0.77801600  | -2.18443800 |
| C  | 2.16226900  | -1.58952700 | -1.69499700 |
| C  | 0.79948600  | -2.06994200 | -2.18002200 |
| C  | -1.56862200 | -2.14865100 | -1.70900600 |
| C  | -2.04486600 | -0.77801600 | -2.18443800 |
| C  | -2.16226900 | 1.58952700  | -1.69499700 |
| C  | -0.79948600 | 2.06994200  | -2.18002200 |
| C  | 0.00000000  | 3.24854000  | -0.20204200 |
| C  | 3.26160200  | -0.00214500 | -0.22215200 |
| C  | 0.00000000  | -3.24854000 | -0.20204200 |
| C  | -3.26160200 | 0.00214500  | -0.22215200 |
| H  | 0.92338000  | 3.39111000  | 0.36444600  |
| H  | -0.22269300 | 4.16152300  | -0.77184400 |
| H  | 4.17305600  | 0.18447900  | -0.80772800 |
| H  | 3.39710000  | -0.90507100 | 0.37860700  |
| H  | 0.22269300  | -4.16152300 | -0.77184400 |
| H  | -0.92338000 | -3.39111000 | 0.36444600  |
| H  | -3.39710000 | 0.90507100  | 0.37860700  |
| H  | -4.17305600 | -0.18447900 | -0.80772800 |
| H  | 2.25397200  | 2.54344400  | -0.96020400 |
| H  | 1.58804700  | 2.84388100  | -2.56572100 |
| H  | 3.04090800  | 0.89012200  | -2.64648500 |
| H  | 1.37396200  | 0.40781900  | -2.96607000 |
| H  | 2.87473000  | -1.62162500 | -2.53719100 |
| H  | 2.54139100  | -2.26506500 | -0.92782200 |
| H  | 0.91067800  | -3.07525200 | -2.62137200 |
| H  | 0.43738100  | -1.41339300 | -2.97742000 |
| H  | -1.58804700 | -2.84388100 | -2.56572100 |
| H  | -2.25397200 | -2.54344400 | -0.96020400 |
| H  | -1.37396200 | -0.40781900 | -2.96607000 |
| H  | -3.04090800 | -0.89012200 | -2.64648500 |
| H  | -2.54139100 | 2.26506500  | -0.92782200 |
| H  | -2.87473000 | 1.62162500  | -2.53719100 |
| H  | -0.43738100 | 1.41339300  | -2.97742000 |
| H  | -0.91067800 | 3.07525200  | -2.62137200 |
| O  | 0.00000000  | 0.00000000  | 2.94748300  |
| H  | 0.42753100  | -0.67169000 | 3.48800700  |
| H  | -0.42753100 | 0.67169000  | 3.48800700  |

**Lu(DOTA)(H<sub>2</sub>O)- TSAP**

|    |             |             |             |
|----|-------------|-------------|-------------|
| Lu | 0.00000000  | 0.00000000  | 0.54515400  |
| N  | 1.86822000  | -0.92995200 | -1.23317700 |
| N  | 0.93767700  | 1.85772200  | -1.20572900 |
| N  | -1.86822000 | 0.92995200  | -1.23317700 |
| N  | -0.93767700 | -1.85772200 | -1.20572900 |
| O  | 1.25054100  | -1.80523700 | 1.17840500  |
| O  | 1.73187500  | 1.26956600  | 1.27897300  |
| O  | -1.25054100 | 1.80523700  | 1.17840500  |
| O  | -1.73187500 | -1.26956600 | 1.27897300  |
| O  | 3.28281400  | -2.75067000 | 1.47826900  |
| O  | 2.65012300  | 3.31190500  | 1.57256800  |
| O  | -3.28281400 | 2.75067000  | 1.47826900  |
| O  | -2.65012300 | -3.31190500 | 1.57256800  |
| C  | 2.49339500  | -2.00020700 | 0.90543500  |
| C  | 1.93469900  | 2.50922800  | 0.97668200  |
| C  | -2.49339500 | 2.00020700  | 0.90543500  |
| C  | -1.93469900 | -2.50922800 | 0.97668200  |
| C  | 2.22828500  | 0.02261200  | -2.29441300 |
| C  | 2.24198400  | 1.45413200  | -1.77570100 |
| C  | 0.00000000  | 2.20594200  | -2.28770400 |
| C  | -1.44666100 | 2.22410400  | -1.81325700 |
| C  | -2.22828500 | -0.02261200 | -2.29441300 |
| C  | -2.24198400 | -1.45413200 | -1.77570100 |
| C  | 0.00000000  | -2.20594200 | -2.28770400 |
| C  | 1.44666100  | -2.22410400 | -1.81325700 |
| C  | 2.99524700  | -1.17675500 | -0.30169700 |
| C  | 1.16517900  | 2.98936000  | -0.27418500 |
| C  | -2.99524700 | 1.17675500  | -0.30169700 |
| C  | -1.16517900 | -2.98936000 | -0.27418500 |
| H  | 1.49739500  | -0.07685600 | -3.10394600 |
| H  | 3.21470600  | -0.21770400 | -2.72754000 |
| H  | 2.98823000  | 1.54599400  | -0.98478900 |
| H  | 2.54252800  | 2.14060500  | -2.58539500 |
| H  | 0.11882800  | 1.46723300  | -3.08725300 |
| H  | 0.25013000  | 3.18801800  | -2.72505700 |
| H  | -1.56534200 | 2.98618200  | -1.04200100 |
| H  | -2.10392500 | 2.50833600  | -2.65252900 |
| H  | -1.49739500 | 0.07685600  | -3.10394600 |
| H  | -3.21470600 | 0.21770400  | -2.72754000 |
| H  | -2.98823000 | -1.54599400 | -0.98478900 |
| H  | -2.54252800 | -2.14060500 | -2.58539500 |
| H  | -0.11882800 | -1.46723300 | -3.08725300 |
| H  | -0.25013000 | -3.18801800 | -2.72505700 |
| H  | 1.56534200  | -2.98618200 | -1.04200100 |
| H  | 2.10392500  | -2.50833600 | -2.65252900 |
| H  | 3.82294800  | -1.70106100 | -0.80143200 |
| H  | 3.35519100  | -0.22045900 | 0.08511800  |
| H  | 1.71611700  | 3.80621000  | -0.76257000 |
| H  | 0.19962300  | 3.36033800  | 0.07641100  |
| H  | -3.82294800 | 1.70106100  | -0.80143200 |
| H  | -3.35519100 | 0.22045900  | 0.08511800  |
| H  | -1.71611700 | -3.80621000 | -0.76257000 |
| H  | -0.19962300 | -3.36033800 | 0.07641100  |
| O  | 0.00000000  | 0.00000000  | 2.92300000  |
| H  | -0.62209000 | -0.49923300 | 3.46166100  |
| H  | 0.62209000  | 0.49923300  | 3.46166100  |

**Np(DOTA)(H<sub>2</sub>O)<sup>-</sup> SAP**

|    |             |             |             |
|----|-------------|-------------|-------------|
| Np | 0.00000000  | 0.00000000  | 0.64083200  |
| N  | 0.00000000  | 2.14423700  | -1.17435200 |
| N  | 2.14368200  | -0.01288800 | -1.17671700 |
| N  | 0.00000000  | -2.14423700 | -1.17435200 |
| N  | -2.14368200 | 0.01288800  | -1.17671700 |
| O  | -1.45883400 | 1.88871900  | 1.23096700  |
| O  | 1.88357200  | 1.52597900  | 1.13391100  |
| O  | 1.45883400  | -1.88871900 | 1.23096700  |
| O  | -1.88357200 | -1.52597900 | 1.13391100  |
| O  | 4.00721900  | 2.26028600  | 0.89271900  |
| O  | 2.19307100  | -4.01050900 | 0.98919200  |
| O  | -4.00721900 | -2.26028600 | 0.89271900  |
| O  | -2.19307100 | 4.01050900  | 0.98919200  |
| C  | -1.44303100 | 3.07080000  | 0.71759600  |
| C  | 3.07171100  | 1.49503200  | 0.64505000  |
| C  | 1.44303100  | -3.07080000 | 0.71759600  |
| C  | -3.07171100 | -1.49503200 | 0.64505000  |
| C  | 1.34276600  | 2.30748800  | -1.78143100 |
| C  | 1.95030900  | 0.98481900  | -2.25157200 |
| C  | 2.32357300  | -1.36255600 | -1.75992500 |
| C  | 1.01350100  | -1.98483600 | -2.23883200 |
| C  | -1.34276600 | -2.30748800 | -1.78143100 |
| C  | -1.95030900 | -0.98481900 | -2.25157200 |
| C  | -2.32357300 | 1.36255600  | -1.75992500 |
| C  | -1.01350100 | 1.98483600  | -2.23883200 |
| C  | -0.31418600 | 3.31671500  | -0.31267400 |
| C  | 3.32538700  | 0.33154600  | -0.34194100 |
| C  | 0.31418600  | -3.31671500 | -0.31267400 |
| C  | -3.32538700 | -0.33154600 | -0.34194100 |
| H  | 0.58353800  | 3.52569200  | 0.27619500  |
| H  | -0.55975700 | 4.19700400  | -0.92332900 |
| H  | 4.19732800  | 0.56012000  | -0.97137000 |
| H  | 3.54914600  | -0.54558800 | 0.27233500  |
| H  | 0.55975700  | -4.19700400 | -0.92332900 |
| H  | -0.58353800 | -3.52569200 | 0.27619500  |
| H  | -3.54914600 | 0.54558800  | 0.27233500  |
| H  | -4.19732800 | -0.56012000 | -0.97137000 |
| H  | 1.98993900  | 2.77152900  | -1.03852700 |
| H  | 1.29814200  | 2.99175900  | -2.64643600 |
| H  | 2.91459700  | 1.20212100  | -2.74260400 |
| H  | 1.30440400  | 0.53690100  | -3.01304200 |
| H  | 3.02652100  | -1.33190900 | -2.61068500 |
| H  | 2.77378400  | -1.99392500 | -0.99393100 |
| H  | 1.23965400  | -2.96339100 | -2.69599800 |
| H  | 0.57757300  | -1.36419600 | -3.02772800 |
| H  | -1.29814200 | -2.99175900 | -2.64643600 |
| H  | -1.98993900 | -2.77152900 | -1.03852700 |
| H  | -1.30440400 | -0.53690100 | -3.01304200 |
| H  | -2.91459700 | -1.20212100 | -2.74260400 |
| H  | -2.77378400 | 1.99392500  | -0.99393100 |
| H  | -3.02652100 | 1.33190900  | -2.61068500 |
| H  | -0.57757300 | 1.36419600  | -3.02772800 |
| H  | -1.23965400 | 2.96339100  | -2.69599800 |
| O  | 0.00000000  | 0.00000000  | 3.23702300  |
| H  | 0.44405900  | -0.64881300 | 3.79387100  |
| H  | -0.44405900 | 0.64881300  | 3.79387100  |

**Np(DOTA)(H<sub>2</sub>O)<sup>-</sup> TSAP**

|    |             |             |             |
|----|-------------|-------------|-------------|
| Np | 0.00000000  | 0.00000000  | 0.59634500  |
| N  | 0.96957300  | 1.89130400  | -1.29848800 |
| N  | -1.88344000 | 0.97439100  | -1.27494800 |
| N  | -0.96957300 | -1.89130400 | -1.29848800 |
| N  | 1.88344000  | -0.97439100 | -1.27494800 |
| O  | 1.93443300  | 1.43447900  | 1.18098900  |
| O  | -1.47115800 | 1.84740300  | 1.28554200  |
| O  | -1.93443300 | -1.43447900 | 1.18098900  |
| O  | 1.47115800  | -1.84740300 | 1.28554200  |
| O  | 2.85881500  | 3.49798800  | 1.28000200  |
| O  | -3.53629100 | 2.76444300  | 1.35710900  |
| O  | -2.85881500 | -3.49798800 | 1.28000200  |
| O  | 3.53629100  | -2.76444300 | 1.35710900  |
| C  | 2.10824600  | 2.64994400  | 0.79734400  |
| C  | -2.67567600 | 2.03644200  | 0.86470700  |
| C  | -2.10824600 | -2.64994400 | 0.79734400  |
| C  | 2.67567600  | -2.03644200 | 0.86470700  |
| C  | 0.00000000  | 2.22659500  | -2.35683000 |
| C  | -1.43549500 | 2.26694400  | -1.83989200 |
| C  | -2.20122700 | 0.02203500  | -2.35655300 |
| C  | -2.24891400 | -1.42693800 | -1.88111700 |
| C  | 0.00000000  | -2.22659500 | -2.35683000 |
| C  | 1.43549500  | -2.26694400 | -1.83989200 |
| C  | 2.20122700  | -0.02203500 | -2.35655300 |
| C  | 2.24891400  | 1.42693800  | -1.88111700 |
| C  | 1.24015600  | 3.05790100  | -0.42040900 |
| C  | -3.05573700 | 1.21532500  | -0.39467200 |
| C  | -1.24015600 | -3.05790100 | -0.42040900 |
| C  | 3.05573700  | -1.21532500 | -0.39467200 |
| H  | 0.09059200  | 1.47839900  | -3.15081700 |
| H  | 0.24149400  | 3.20119000  | -2.81515200 |
| H  | -1.51597900 | 3.01248700  | -1.04679300 |
| H  | -2.10635600 | 2.58809300  | -2.65531700 |
| H  | -1.44053600 | 0.13016500  | -3.13614900 |
| H  | -3.16863200 | 0.27374800  | -2.82475500 |
| H  | -3.01399000 | -1.53110600 | -1.11056900 |
| H  | -2.54872600 | -2.07205300 | -2.72481100 |
| H  | -0.09059200 | -1.47839900 | -3.15081700 |
| H  | -0.24149400 | -3.20119000 | -2.81515200 |
| H  | 1.51597900  | -3.01248700 | -1.04679300 |
| H  | 2.10635600  | -2.58809300 | -2.65531700 |
| H  | 1.44053600  | -0.13016500 | -3.13614900 |
| H  | 3.16863200  | -0.27374800 | -2.82475500 |
| H  | 3.01399000  | 1.53110600  | -1.11056900 |
| H  | 2.54872600  | 2.07205300  | -2.72481100 |
| H  | 1.73541200  | 3.86725800  | -0.97668400 |
| H  | 0.28945200  | 3.43052000  | -0.02795200 |
| H  | -3.86132600 | 1.72845700  | -0.93972200 |
| H  | -3.42546900 | 0.25055000  | -0.03615100 |
| H  | -1.73541200 | -3.86725800 | -0.97668400 |
| H  | -0.28945200 | -3.43052000 | -0.02795200 |
| H  | 3.86132600  | -1.72845700 | -0.93972200 |
| H  | 3.42546900  | -0.25055000 | -0.03615100 |
| O  | 0.00000000  | 0.00000000  | 3.17420400  |
| H  | 0.54548700  | -0.56966100 | 3.72745400  |
| H  | -0.54548700 | 0.56966100  | 3.72745400  |

**Pu(DOTA)(H<sub>2</sub>O)<sup>-</sup> SAP**

|    |             |             |             |
|----|-------------|-------------|-------------|
| Pu | 0.00000000  | 0.00000000  | 0.62355700  |
| N  | 0.00000000  | 2.14007200  | -1.17147400 |
| N  | 2.14026300  | -0.01351700 | -1.17344600 |
| N  | 0.00000000  | -2.14007200 | -1.17147400 |
| N  | -2.14026300 | 0.01351700  | -1.17344600 |
| O  | -1.45137200 | 1.86611900  | 1.23395900  |
| O  | 1.86255600  | 1.52029600  | 1.13374100  |
| O  | 1.45137200  | -1.86611900 | 1.23395900  |
| O  | -1.86255600 | -1.52029600 | 1.13374100  |
| O  | 3.98567200  | 2.26071700  | 0.90924500  |
| O  | 2.19441800  | -3.98613600 | 1.00682600  |
| O  | -3.98567200 | -2.26071700 | 0.90924500  |
| O  | -2.19441800 | 3.98613600  | 1.00682600  |
| C  | -1.44066200 | 3.05148300  | 0.72799800  |
| C  | 3.05412200  | 1.49320900  | 0.65341000  |
| C  | 1.44066200  | -3.05148300 | 0.72799800  |
| C  | -3.05412200 | -1.49320900 | 0.65341000  |
| C  | 1.34245500  | 2.30675500  | -1.77822900 |
| C  | 1.95127800  | 0.98484300  | -2.24847900 |
| C  | 2.32312400  | -1.36255100 | -1.75687100 |
| C  | 1.01356200  | -1.98483200 | -2.23642900 |
| C  | -1.34245500 | -2.30675500 | -1.77822900 |
| C  | -1.95127800 | -0.98484300 | -2.24847900 |
| C  | -2.32312400 | 1.36255100  | -1.75687100 |
| C  | -1.01356200 | 1.98483200  | -2.23642900 |
| C  | -0.31566800 | 3.30756100  | -0.30347200 |
| C  | 3.31729000  | 0.33128400  | -0.33224000 |
| C  | 0.31566800  | -3.30756100 | -0.30347200 |
| C  | -3.31729000 | -0.33128400 | -0.33224000 |
| H  | 0.58254100  | 3.51628300  | 0.28452600  |
| H  | -0.56613000 | 4.18981700  | -0.90920600 |
| H  | 4.19217700  | 0.56203200  | -0.95672500 |
| H  | 3.53844700  | -0.54591600 | 0.28271800  |
| H  | 0.56613000  | -4.18981700 | -0.90920600 |
| H  | -0.58254100 | -3.51628300 | 0.28452600  |
| H  | -3.53844700 | 0.54591600  | 0.28271800  |
| H  | -4.19217700 | -0.56203200 | -0.95672500 |
| H  | 1.98898500  | 2.77148200  | -1.03520100 |
| H  | 1.29666900  | 2.99136600  | -2.64282400 |
| H  | 2.91727200  | 1.20192200  | -2.73614200 |
| H  | 1.30734500  | 0.53778100  | -3.01219500 |
| H  | 3.02696400  | -1.33071100 | -2.60674200 |
| H  | 2.77315200  | -1.99400900 | -0.99078300 |
| H  | 1.23868700  | -2.96475500 | -2.69106800 |
| H  | 0.57863500  | -1.36527600 | -3.02679000 |
| H  | -1.29666900 | -2.99136600 | -2.64282400 |
| H  | -1.98898500 | -2.77148200 | -1.03520100 |
| H  | -1.30734500 | -0.53778100 | -3.01219500 |
| H  | -2.91727200 | -1.20192200 | -2.73614200 |
| H  | -2.77315200 | 1.99400900  | -0.99078300 |
| H  | -3.02696400 | 1.33071100  | -2.60674200 |
| H  | -0.57863500 | 1.36527600  | -3.02679000 |
| H  | -1.23868700 | 2.96475500  | -2.69106800 |
| O  | 0.00000000  | 0.00000000  | 3.19363300  |
| H  | 0.45020500  | -0.64580000 | 3.74885400  |
| H  | -0.45020500 | 0.64580000  | 3.74885400  |

**Pu(DOTA)(H<sub>2</sub>O)<sup>-</sup> TSAP**

|    |             |             |             |
|----|-------------|-------------|-------------|
| Pu | 0.00000000  | 0.00000000  | 0.58043200  |
| N  | 0.96740400  | 1.88772700  | -1.29565500 |
| N  | -1.87983800 | 0.97295700  | -1.27174100 |
| N  | -0.96740400 | -1.88772700 | -1.29565500 |
| N  | 1.87983800  | -0.97295700 | -1.27174100 |
| O  | 1.92593600  | 1.41301300  | 1.17827200  |
| O  | -1.44787200 | 1.83865800  | 1.28380900  |
| O  | -1.92593600 | -1.41301300 | 1.17827200  |
| O  | 1.44787200  | -1.83865800 | 1.28380900  |
| O  | 2.85431300  | 3.47357200  | 1.29464300  |
| O  | -3.51146800 | 2.75654200  | 1.37650700  |
| O  | -2.85431300 | -3.47357200 | 1.29464300  |
| O  | 3.51146800  | -2.75654200 | 1.37650700  |
| C  | 2.10192600  | 2.63133200  | 0.80473300  |
| C  | -2.65621200 | 2.02922400  | 0.87410200  |
| C  | -2.10192600 | -2.63133200 | 0.80473300  |
| C  | 2.65621200  | -2.02922400 | 0.87410200  |
| C  | 0.00000000  | 2.22703900  | -2.35428800 |
| C  | -1.43519700 | 2.26629800  | -1.83727500 |
| C  | -2.20202600 | 0.02228700  | -2.35325200 |
| C  | -2.24795800 | -1.42655500 | -1.87795800 |
| C  | 0.00000000  | -2.22703900 | -2.35428800 |
| C  | 1.43519700  | -2.26629800 | -1.83727500 |
| C  | 2.20202600  | -0.02228700 | -2.35325200 |
| C  | 2.24795800  | 1.42655500  | -1.87795800 |
| C  | 1.23608400  | 3.04949900  | -0.41071800 |
| C  | -3.04705700 | 1.21297100  | -0.38471900 |
| C  | -1.23608400 | -3.04949900 | -0.41071800 |
| C  | 3.04705700  | -1.21297100 | -0.38471900 |
| H  | 0.09057400  | 1.48058700  | -3.15000600 |
| H  | 0.24263200  | 3.20266100  | -2.80977500 |
| H  | -1.51610700 | 3.01190300  | -1.04434600 |
| H  | -2.10718900 | 2.58602600  | -2.65224000 |
| H  | -1.44375800 | 0.13077700  | -3.13524100 |
| H  | -3.17093600 | 0.27472600  | -2.81785500 |
| H  | -3.01271500 | -1.53156800 | -1.10727400 |
| H  | -2.54671800 | -2.07251500 | -2.72128900 |
| H  | -0.09057400 | -1.48058700 | -3.15000600 |
| H  | -0.24263200 | -3.20266100 | -2.80977500 |
| H  | 1.51610700  | -3.01190300 | -1.04434600 |
| H  | 2.10718900  | -2.58602600 | -2.65224000 |
| H  | 1.44375800  | -0.13077700 | -3.13524100 |
| H  | 3.17093600  | -0.27472600 | -2.81785500 |
| H  | 3.01271500  | 1.53156800  | -1.10727400 |
| H  | 2.54671800  | 2.07251500  | -2.72128900 |
| H  | 1.73284700  | 3.86189000  | -0.96112300 |
| H  | 0.28498400  | 3.41935700  | -0.01691200 |
| H  | -3.85451200 | 1.72978800  | -0.92342900 |
| H  | -3.41629700 | 0.24808700  | -0.02635600 |
| H  | -1.73284700 | -3.86189000 | -0.96112300 |
| H  | -0.28498400 | -3.41935700 | -0.01691200 |
| H  | 3.85451200  | -1.72978800 | -0.92342900 |
| H  | 3.41629700  | -0.24808700 | -0.02635600 |
| O  | 0.00000000  | 0.00000000  | 3.13528400  |
| H  | 0.53950900  | -0.57695600 | 3.68660300  |
| H  | -0.53950900 | 0.57695600  | 3.68660300  |

**U(DOTA)(H<sub>2</sub>O)- SAP**

|   |             |             |             |
|---|-------------|-------------|-------------|
| U | 0.00000000  | 0.00000000  | 0.66140900  |
| N | 0.00000000  | 2.14854500  | -1.17717500 |
| N | 2.14754300  | -0.01228200 | -1.17945000 |
| N | 0.00000000  | -2.14854500 | -1.17717500 |
| N | -2.14754300 | 0.01228200  | -1.17945000 |
| O | -1.46611600 | 1.91312300  | 1.22761100  |
| O | 1.90569500  | 1.53221400  | 1.13330300  |
| O | 1.46611600  | -1.91312300 | 1.22761100  |
| O | -1.90569500 | -1.53221400 | 1.13330300  |
| O | 4.02764900  | 2.26481400  | 0.87094700  |
| O | 2.19949900  | -4.03270000 | 0.96171100  |
| O | -4.02764900 | 2.26481400  | 0.87094700  |
| O | -2.19949900 | 4.03270000  | 0.96171100  |
| C | -1.44735300 | 3.09069000  | 0.70406400  |
| C | 3.08926100  | 1.50007900  | 0.63304000  |
| C | 1.44735300  | -3.09069000 | 0.70406400  |
| C | -3.08926100 | -1.50007900 | 0.63304000  |
| C | 1.34294800  | 2.30807100  | -1.78524500 |
| C | 1.94934800  | 0.98440400  | -2.25449100 |
| C | 2.32448500  | -1.36275900 | -1.76227400 |
| C | 1.01401100  | -1.98511200 | -2.24082600 |
| C | -1.34294800 | -2.30807100 | -1.78524500 |
| C | -1.94934800 | -0.98440400 | -2.25449100 |
| C | -2.32448500 | 1.36275900  | -1.76227400 |
| C | -1.01401100 | 1.98511200  | -2.24082600 |
| C | -0.31224300 | 3.32633000  | -0.32202400 |
| C | 3.33405300  | 0.33221800  | -0.35147800 |
| C | 0.31224300  | -3.32633000 | -0.32202400 |
| C | -3.33405300 | -0.33221800 | -0.35147800 |
| H | 0.58432000  | 3.53370600  | 0.26934900  |
| H | -0.55067400 | 4.20507200  | -0.93780300 |
| H | 4.20355600  | 0.55629500  | -0.98595100 |
| H | 3.55890600  | -0.54375600 | 0.26421200  |
| H | 0.55067400  | -4.20507200 | -0.93780300 |
| H | -0.58432000 | -3.53370600 | 0.26934900  |
| H | -3.55890600 | 0.54375600  | 0.26421200  |
| H | -4.20355600 | -0.55629500 | -0.98595100 |
| H | 1.99108600  | 2.77256800  | -1.04343800 |
| H | 1.29899700  | 2.99110200  | -2.65136300 |
| H | 2.91181100  | 1.20140500  | -2.74929300 |
| H | 1.30113300  | 0.53515900  | -3.01313600 |
| H | 3.02648300  | -1.33305900 | -2.61395100 |
| H | 2.77516300  | -1.99428700 | -0.99670700 |
| H | 1.24115900  | -2.96248300 | -2.70005900 |
| H | 0.57742400  | -1.36359800 | -3.02859400 |
| H | -1.29899700 | -2.99110200 | -2.65136300 |
| H | -1.99108600 | -2.77256800 | -1.04343800 |
| H | -1.30113300 | -0.53515900 | -3.01313600 |
| H | -2.91181100 | -1.20140500 | -2.74929300 |
| H | -2.77516300 | 1.99428700  | -0.99670700 |
| H | -3.02648300 | 1.33305900  | -2.61395100 |
| H | -0.57742400 | 1.36359800  | -3.02859400 |
| H | -1.24115900 | 2.96248300  | -2.70005900 |
| O | 0.00000000  | 0.00000000  | 3.28523500  |
| H | 0.43651400  | -0.65233100 | 3.84417900  |
| H | -0.43651400 | 0.65233100  | 3.84417900  |

**U(DOTA)(H<sub>2</sub>O)- TSAP**

|   |             |             |             |
|---|-------------|-------------|-------------|
| U | 0.00000000  | 0.00000000  | 0.61444000  |
| N | -0.97168000 | -1.89504600 | -1.30194800 |
| N | 1.88726100  | -0.97594400 | -1.27911300 |
| N | 0.97168000  | 1.89504600  | -1.30194800 |
| N | -1.88726100 | 0.97594400  | -1.27911300 |
| O | -1.94265100 | -1.45794600 | 1.18384900  |
| O | 1.49660500  | -1.85619000 | 1.28598900  |
| O | 1.94265100  | 1.45794600  | 1.18384900  |
| O | -1.49660500 | 1.85619000  | 1.28598900  |
| O | -2.86418000 | -3.52379100 | 1.26293500  |
| O | 3.56420300  | -2.76979800 | 1.33719200  |
| O | 2.86418000  | 3.52379100  | 1.26293500  |
| O | -3.56420300 | 2.76979800  | 1.33719200  |
| C | -2.11483900 | -2.66995400 | 0.78873900  |
| C | 2.69738500  | -2.04286400 | 0.85418300  |
| C | 2.11483900  | 2.66995400  | 0.78873900  |
| C | -2.69738500 | 2.04286400  | 0.85418300  |
| C | 0.00000000  | -2.22605600 | -2.36001200 |
| C | 1.43582500  | -2.26759800 | -1.84325300 |
| C | 2.19994000  | -0.02171100 | -2.36068700 |
| C | 2.24967500  | 1.42728200  | -1.88473700 |
| C | 0.00000000  | 2.22605600  | -2.36001200 |
| C | -1.43582500 | 2.26759800  | -1.84325300 |
| C | -2.19994000 | 0.02171100  | -2.36068700 |
| C | -2.24967500 | -1.42728200 | -1.88473700 |
| C | -1.24433800 | -3.06682700 | -0.43146600 |
| C | 3.06530700  | -1.21790200 | -0.40677300 |
| C | 1.24433800  | 3.06682700  | -0.43146600 |
| C | -3.06530700 | 1.21790200  | -0.40677300 |
| H | -0.09047000 | -1.47592200 | -3.15208600 |
| H | -0.24024900 | -3.19950800 | -2.82147600 |
| H | 1.51582900  | -3.01285500 | -1.04979400 |
| H | 2.10530400  | -2.59047800 | -2.65924800 |
| H | 1.43644700  | -0.12916000 | -3.13754500 |
| H | 3.16558200  | -0.27245100 | -2.83313000 |
| H | 3.01490300  | 1.53026300  | -1.11412400 |
| H | 2.55090000  | 2.07159800  | -2.72863900 |
| H | 0.09047000  | 1.47592200  | -3.15208600 |
| H | 0.24024900  | 3.19950800  | -2.82147600 |
| H | -1.51582900 | 3.01285500  | -1.04979400 |
| H | -2.10530400 | 2.59047800  | -2.65924800 |
| H | -1.43644700 | 0.12916000  | -3.13754500 |
| H | -3.16558200 | 0.27245100  | -2.83313000 |
| H | -3.01490300 | -1.53026300 | -1.11412400 |
| H | -2.55090000 | -2.07159800 | -2.72863900 |
| H | -1.73798900 | -3.87282200 | -0.99410000 |
| H | -0.29413000 | -3.44252000 | -0.04042500 |
| H | 3.86827700  | -1.72783500 | -0.95875200 |
| H | 3.43655300  | -0.25329500 | -0.04896100 |
| H | 1.73798900  | 3.87282200  | -0.99410000 |
| H | 0.29413000  | 3.44252000  | -0.04042500 |
| H | -3.86827700 | 1.72783500  | -0.95875200 |
| H | -3.43655300 | 0.25329500  | -0.04896100 |
| O | 0.00000000  | 0.00000000  | 3.21814500  |
| H | -0.55322600 | 0.56056300  | 3.77321600  |
| H | 0.55322600  | -0.56056300 | 3.77321600  |
